# Supplementary material for: Highly diverse ribonucleic acid viruses in the viromes of eukaryotic host species in Yunnan province, China
Source: Front Microbiol. 2022 Oct 13;13:1019444. doi: 10.3389/fmicb.2022.1019444 (PMC9606678; doi:10.3389/fmicb.2022.1019444)
Supplement: Supplementary file 1 [file Data_Sheet_1.xlsx]

## Sheet: SRA
accession	study	object_status	bioproject_accession	biosample_accession	sample_name	library_ID	title	library_strategy	library_source	library_selection	library_layout	platform	instrument_model	design_description	filetype	filename	filename2	filename3	filename4	assembly	fasta_file
SRR13364364	SRP300585	new	PRJNA689958	SAMN17222308	YN-BF	BF1	meta-transcriptome sequencing	RNA-Seq	TRANSCRIPTOMIC	cDNA	paired	ILLUMINA	Illumina NovaSeq 6000	pooling all nucleotide samples of different species for transcriptome sequencing	fastq	LR200318-0001_L4_1000957.R1.fastq.gz	LR200318-0001_L4_1000957.R2.fastq.gz
SRR13364363	SRP300585	new	PRJNA689958	SAMN17222308	YN-BF	BF2	meta-transcriptome sequencing	RNA-Seq	TRANSCRIPTOMIC	cDNA	paired	ILLUMINA	Illumina NovaSeq 6000	pooling all nucleotide samples of different species for transcriptome sequencing	fastq	LR200318-0002_L4_1000788.R1.fastq.gz	LR200318-0002_L4_1000788.R2.fastq.gz
SRR13364362	SRP300585	new	PRJNA689958	SAMN17222308	YN-BF	BF3	meta-transcriptome sequencing	RNA-Seq	TRANSCRIPTOMIC	cDNA	paired	ILLUMINA	Illumina NovaSeq 6000	pooling all nucleotide samples of different species for transcriptome sequencing	fastq	LR200318-0003_L4_1000789.R1.fastq.gz	LR200318-0003_L4_1000789.R2.fastq.gz
SRR13364361	SRP300585	new	PRJNA689958	SAMN17222309	YN-CS	CS9	meta-transcriptome sequencing	RNA-Seq	TRANSCRIPTOMIC	cDNA	paired	ILLUMINA	Illumina NovaSeq 6000	pooling all nucleotide samples of different species for transcriptome sequencing	fastq	LR200318-0009_L3_1000743.R1.fastq.gz	LR200318-0009_L3_1000743.R2.fastq.gz
SRR13364366	SRP300585	new	PRJNA689958	SAMN17222309	YN-CS	CS10	meta-transcriptome sequencing	RNA-Seq	TRANSCRIPTOMIC	cDNA	paired	ILLUMINA	Illumina NovaSeq 6000	pooling all nucleotide samples of different species for transcriptome sequencing	fastq	LR200318-0010_L3_1000958.R1.fastq.gz	LR200318-0010_L3_1000958.R2.fastq.gz
SRR13364365	SRP300585	new	PRJNA689958	SAMN17222310	YN-OT	YN19	meta-transcriptome sequencing	RNA-Seq	TRANSCRIPTOMIC	cDNA	paired	ILLUMINA	Illumina NovaSeq 6000	pooling all nucleotide samples of different species for transcriptome sequencing	fastq	LR200318-0019_L1_1001291.R1.fastq.gz	LR200318-0019_L1_1001291.R2.fastq.gz

## Sheet: GenBank
LOCUS CS9-Cali-YN-CHN-2020 7190 bp RNA linear VRL 07-JAN-2021
DEFINITION Unclassified Sapovirus isolate CS9-Cali-YN-CHN-2020.
ACCESSION CS9-Cali-YN-CHN-2020
VERSION
KEYWORDS .
SOURCE unclassified Sapovirus
ORGANISM unclassified Sapovirus
Viruses; Riboviria; Orthornavirae; Pisuviricota; Pisoniviricetes;
Picornavirales; Caliciviridae; Sapovirus.
REFERENCE 1 (bases 1 to 7190)
AUTHORS Han,Z., Xiao,J., Song,Y., Lu,H., Zhang,K., Li,J., Si,F., Sun,Q.,
Wang,D., Zhu,S., Yan,D., Xu,W. and Zhang,Y.
TITLE Large-scale screening for SARS-CoV-2 from specimens of several host
species and highly diverse RNA viruses
JOURNAL unpublished
REFERENCE 2 (bases 1 to 7190)
AUTHORS Han,Z., Xiao,J., Song,Y., Lu,H., Zhang,K., Li,J., Si,F., Sun,Q.,
Wang,D., Zhu,S., Yan,D., Xu,W. and Zhang,Y.
TITLE Direct Submission
JOURNAL Submitted (07-JAN-2021) National Institute for Viral Disease
Control and Prevention, Chinese Center for Disease Control and
Prevention, No. 155, Changbai Road, Changping District, Beijing,
Beijing 102206, China
COMMENT Bankit Comment: ALT EMAIL:hansir8@qq.com
Bankit Comment: TOTAL # OF SEQS:20
##Assembly-Data-START##
Assembly Method :: Trinity v. 2.8.4; Sequencher v. 5.0
Assembly Name :: metagenomic assembly
Coverage :: 90
Sequencing Technology :: Illumina
##Assembly-Data-END##
FEATURES Location/Qualifiers
source 1..7190
/organism="unclassified Sapovirus"
/mol_type="genomic RNA"
/isolate="CS9-Cali-YN-CHN-2020"
/isolation_source="anal and throat swabs"
/host="Malayan pangolin"
/db_xref="taxon:371833"
/country="China"
/collection_date="20-Feb-2020"
5'UTR 1..7
CDS 8..6919
/codon_start=1
/product="ORF1 protein"
/translation="MSRLPPPLPHGKGGEGFPCLYSRGHSLHHHFHENDMCQLCRPVN
IKCQHTCCEVVYWQSKLPHYRRPRVSKFKPKQFIHEGLADVWAVPDVVTGEDGGPDPV
LTRALLSHLLGIDVPEKITKANRNLVEGLYHVRETIIAHHKSPTATSDIGLDPDQRRA
AVELLDNLLPCSTKAKRRPITPAQEAAVEELMQDVSKWFEVPQQNRKDACRALFKRLA
AGCSDALGALKAMADPLVKRMPSIDQVGQFADMVANGIAESEEGDTGARIMRLVLQLK
PTLLTMVCQNHINSISGWMVTITALIEMYSDLPSALSWVSDILHWCLDQIEAISTTTY
QMFSKWVSGLFKAEGLSDWLPHLCALFGLLYLLIVGRVPTQGVTTALTKVTQLFNGHV
NTLKNIKWLSDWFKQNAWANKVRNFMVKSSALLDNLSENPSPDSNECKGLLSCIDIML
SEGEEVLFEIGNSPLGGVVRTQMDKLTTAQQGFRNNLALNCERNPPQAWIFTGPPGIG
KTRLCHALAAKMKLATSTFTLARDHHDTYTNNPVAIWDEFDTDPKGDFVETMIGLVNS
TPYPLNCDRVENKTKVFTSDIILCTSNFPCSVRPDHPRAGAFYRRITTVDVSAPAITD
WVKKNPGKEPPPNLYASDFSHLNFSIRPHLGIDPGGNTLDGVSVQPTNCTFSGLVRRM
NKRYKHEAAPVTAIWVKTKPELLQSVYDTLVGWRTWCGAGCCIEINPPAGWSPETNLG
ARHIIIAGTDMPQAWAGCVQVNVTGHRKVMGNNYEIHRRNTHGNPFDTLEHYPSVRSP
IMRDVAYGIDGVEITLSDQLPPHLTIPYTRVVYVTNIYNIIGGLYRHACIWSISGTAK
ALMVASKGLANWIDVFHCLKDITWTSSPCTTLFRTPTGDILFSTYGKGMRVLGLIGRI
RVTSFTDQQPSLRSMFYGYDWWDTLHRLAEAIASKWTVIGLMLLTLTNVTYMLKRSKR
SHEAKGKTKHTVRGARSRRVGGLSDEEYDEWKDIQRDWRREMTIQDWLALRERAAAGG
NDAEAQRFRAWFEVRALRMANRAYNYEVVDVIGKQGHRVEVHRTTQLRAGQEERDFDA
PFVPEGVTAVLGVFDADGARVGWATHVGNGRLVSAAHLFSDGTIIQDCPEYDIVDTVY
DTIYIKTKYKGPAYPTSDGDPAFFGLTKHPVRNVLPGTYDTSSTRVDGWMVQITTGLD
TKAGDCGLPYFNLRGGVCGVHSASSTDRRDKLVSKVAQPKAVEKSIVWKGLKVAKTGV
SVGSMPTGTRYHRSPAAKSHPPEHDTHAPAPFGRGDQRYSFSQTEMLVNGLRPYQETP
VLPFKANILRAACNDSKAYLRSVIGTHKTPNLTYSSAQTLLDSATSCGPHVPGLKKDY
LNDEGKYIGMLEEHFGRCWDEAQRGVSLPHDYKLALKDELRPVEKCAEGKRRLLWGAD
AGVTLIANAAFAGVAERLKSTVPMHPVCVGINMDSAQSQLLSDACQLGHVYNLDYTKW
DSTMQPVVIASAVDIMADFAEDSALTSSAAATLKSPANGYIDDVKFTTVTGLPSGMPF
TSQVNSICHMILFAYCVRAAYDQANVPYSSNVFNTETIFTYGDDGLYVLTEATHSLMP
QIVGEMCKVGLKPTSPDKSPTITEVSGDPVFLKRSLHRDHRGRCWARLDKSSLMRQCY
WVKAQNTLDVTLPPHIDQVARAQQLDNVCIYASQWDDSTATEIIDLVTTTAEVEGVAL
SMNLLSLARAEYEKWYCGLLQGQSQENPEASLKKVFVMEGDERPSPGASAPGLAGPED
NGPLVVTAPQPVAPVQAAAMAAATGSLPSSLPPEVQATWVTLTNITWNTRQGPNTLLG
ALQLGPGLNPYVAHLSQMWTAWGGSMLVRLTVSGSGLYGGRLLAAVLPPGVNTADVNN
PGAFPHVLIDARQTEPFTITIPDIRPTDFHVDGDNIPTCSVGLWVFNPLINPFGGNAA
VVSQVYISVETKPGPDFDFAMLKPPNQRTTAGEHPRPLLPRRLGTSRGNRTGGFVSGG
LIVQQWDQVNHHWDVDSVTYGWSVGPVSPLVCNIDTGNLTNGVVTVDADGKGPIMVNI
PNNFPDFCASTANSTGTSPSSWHTAAGPLNTFDDHWDVAEHQVWNAVACVSDNPGTNA
GTITLASQINAANMCLVRNYGQQEHTSGTNAIFTPTWLQGQASVNPSVTPVYSVNRAY
GPAGPNQIFLWCEEFLRDYPQRSVVYCSQLGLTANLLEHANYYIPQNNFAVWQVDTGG
NTFQLGMTRTGVFYTGGAAGTTVNLTPETTFEFVGFFPISTALMGPVSATGFRHG"
CDS 6912..7190
/codon_start=1
/product="partial ORF2"
/translation="MVSWAAGINAALNIALGAAGVASNIVNQTQVNQANKDLLKIQQQ
LAQSQIAAQSEQMSYYKLMNDPVERFQRAVQAGYGVDSAAQFAGRSAPH"
BASE COUNT 1832 a 1851 c 1807 g 1700 t
ORIGIN
1 ggcggcgatg agccgactcc cccccccctt gccccatggc aaggggggag agggcttccc
61 ctgcctttat agcagaggac attccttaca tcatcatttc catgaaaatg atatgtgcca
121 actatgcaga cctgttaaca tcaagtgtca gcacacttgt tgtgaggttg tgtattggca
181 atccaaactt ccccactacc gacggcccag agttagcaag ttcaaaccaa agcaatttat
241 ccatgaaggg cttgctgatg tttgggccgt cccagacgta gtcacggggg aggatggtgg
301 accagaccca gtccttacac gggcgttgct ttcacaccta cttggtatcg acgtgcctga
361 gaagatcaca aaggctaatc gtaaccttgt agagggtctg tatcatgtgc gcgagactat
421 cattgcgcac cacaagagcc ccactgcaac gtctgacatt ggtcttgacc cagaccaacg
481 tagggctgca gttgaactac ttgataacct cctgccctgt tccacaaagg ctaagcgcag
541 gccgatcacg ccagcacaag aagctgcagt tgaagagttg atgcaggacg taagcaagtg
601 gtttgaagtg ccacagcaga accgcaagga cgcttgcagg gcgttgttca aacgccttgc
661 agcaggctgt agtgatgctc ttggcgcact gaaggccatg gctgacccgt tggttaagcg
721 tatgccctca atcgatcagg ttgggcagtt cgctgatatg gtcgccaatg gcattgctga
781 gtctgaagag ggtgacactg gtgctagaat tatgcgcctt gtgttacagc ttaaaccaac
841 actgttaact atggtgtgtc aaaaccacat aaattccatc agtgggtgga tggtcaccat
901 aacagcgctg attgagatgt acagtgactt accatcagcc ctgtcttggg tctcagacat
961 cttacactgg tgtttagacc agatagaggc aatctccaca acaacttatc agatgttcag
1021 taaatgggtc tcaggtctgt tcaaggcaga gggcctgtca gattggttac cccacctttg
1081 tgcactattt ggactgctct accttctgat tgttgggcgt gtcccaacgc agggggtaac
1141 gacagcactg accaaagtga cccagctttt taacggacat gttaacacgc tcaagaacat
1201 caagtggctc agcgactggt ttaaacaaaa cgcatgggcc aacaaagtcc gcaacttcat
1261 ggtcaagtcc agtgccctac tagacaactt atctgaaaat ccatctccag atagtaacga
1321 gtgtaagggc ctcttatcct gcattgacat tatgctatca gagggtgaag aagtgctgtt
1381 tgaaattggc aactctccat taggtggtgt agtgcgcacc caaatggaca aactgacaac
1441 tgctcaacag ggctttcgca acaaccttgc gttgaattgt gagcgcaacc cacctcaggc
1501 gtggattttt acaggccccc caggcattgg caagacccga ttgtgccatg ccttagcagc
1561 aaaaatgaaa ctggccacta gcacattcac acttgctagg gaccaccacg acacttacac
1621 caacaaccct gttgctatat gggatgagtt tgacaccgac cccaaaggtg actttgttga
1681 aactatgatt ggccttgtga attcaacacc gtatccactc aactgtgatc gggtggaaaa
1741 taagaccaag gtgttcacta gtgacattat actgtgtaca agcaacttcc catgcagcgt
1801 tcggcctgac catccacgtg ctggtgcttt ttatcgacgt atcacaactg ttgatgtatc
1861 agcaccggca ataacagact gggtcaagaa gaaccctggt aaagagccac caccgaacct
1921 ttatgcctca gacttttccc atctaaattt ttcaataaga ccacatcttg gaatcgaccc
1981 tggtggtaat acacttgatg gggtcagtgt acagccaaca aactgtacat tttcgggcct
2041 ggtgcgccgg atgaacaagc gatacaagca cgaggctgcg ccagtcaccg caatttgggt
2101 caagacaaaa cctgagttgc tacagagcgt gtacgacacg ctcgttgggt ggcgtacgtg
2161 gtgcggtgca ggctgttgca ttgagattaa tccaccagca ggctggtcgc ctgaaaccaa
2221 cttaggcgcg cgccatataa tcattgcggg cacagatatg ccccaggcct gggctggatg
2281 tgtccaggtc aatgtcaccg gccaccggaa agtaatgggc aacaactacg agatccaccg
2341 ccgcaacact cacggcaacc catttgacac cttagaacac tacccaagcg tgcgctcacc
2401 gatcatgcgt gacgtggctt acggtattga tggagttgag atcacattgt ctgaccagtt
2461 gcctccccat ttaaccatcc cttacaccag agtagtttat gtaaccaaca tctataacat
2521 cattggtggc ctgtacaggc atgcgtgtat atggtcaata tctggcactg ctaaggccct
2581 catggtagct tccaagggat tggcaaattg gattgacgtt ttccattgcc ttaaggacat
2641 cacttggaca tcctccccat gcacaacact ctttaggaca cccacaggag acatactatt
2701 ttccacttat ggtaagggta tgcgggtgct tggactcatt gggcgcattc gtgtcacatc
2761 attcacagac caacaaccat cacttaggtc aatgttctac ggttatgact ggtgggatac
2821 tcttcatcgt ctcgctgaag ccatagctag caagtggact gtaattgggc ttatgctcct
2881 aacactgact aacgtgacat acatgttgaa aagatcaaag cgctcccatg aggcaaaagg
2941 taaaacaaaa cacactgtac gtggggcgcg ctcacggaga gtgggtgggc tgtcagatga
3001 ggagtacgat gagtggaaag acattcagcg tgactggcgc agggagatga ccattcaaga
3061 ttggctcgca cttagggagc gtgcggcggc tggtggcaac gatgcagagg cacagagatt
3121 tagagcctgg tttgaagtca gggcgttacg aatggcaaac agggcctata attatgaggt
3181 cgtggatgtc attggtaagc aaggccaccg tgttgaggtc caccggacca ctcagctccg
3241 tgcagggcaa gaagagagag actttgacgc accatttgtt cctgaaggag taacagctgt
3301 ccttggtgtg ttcgatgcag atggagcccg ggttggctgg gccacccatg tgggtaacgg
3361 gcgcctcgtt tctgctgccc acttgttcag tgatggaacc atcatacaag actgtccaga
3421 gtatgatatt gtggacacgg tttatgacac aatttacatt aagaccaaat acaaaggccc
3481 tgcctatcca accagtgatg gtgaccccgc attctttggc ctcacaaagc accctgtccg
3541 gaatgtactc ccaggcactt atgacacctc aagtaccaga gtagatggct ggatggtgca
3601 aatcaccact gggcttgaca ccaaggctgg agactgtggc ctcccgtatt tcaacctacg
3661 gggtggggta tgtggcgtgc actcagcatc atcaactgac aggcgcgata agctagtttc
3721 aaaagtcgcc caacctaaag cagttgagaa atcaatagtc tggaaagggc ttaaggttgc
3781 caagactggg gttagtgtgg gctctatgcc gactggtacc agataccatc ggtcaccagc
3841 tgccaagtcc cacccacctg aacatgacac acacgcccct gcgccttttg gccgtggtga
3901 tcaacgctac tccttttccc aaaccgagat gcttgtcaat ggtctcaggc cataccagga
3961 aacccccgtt ctacccttta aggctaacat ccttcgtgcc gcatgcaatg actcaaaagc
4021 ctacctaagg agcgtgattg gcacccataa gacacccaac ctcacctact catcagcaca
4081 aaccctcctc gattccgcaa catcatgtgg cccacatgtt cctggcctaa agaaagatta
4141 tttgaatgat gaaggcaaat atataggcat gctagaggag cattttgggc gctgttggga
4201 cgaggcgcag cggggagtgt cactccctca tgattacaag ttagcattga aggacgagtt
4261 gagacctgtg gagaagtgtg ctgagggaaa gagacgcctt ttatggggtg ctgatgcagg
4321 ggtgacactg attgctaatg cggcctttgc cggtgttgct gagcggttga agagcactgt
4381 cccgatgcac cctgtttgtg ttggtattaa catggactca gcacagtccc agctgttgtc
4441 tgacgcgtgt cagcttgggc acgtttacaa cctagactac acaaaatggg actcaactat
4501 gcagccagtg gtgattgcat ctgctgttga tatcatggca gactttgccg aagattctgc
4561 acttacatcc agcgccgcag caacactcaa gagccctgct aacggctaca ttgatgatgt
4621 caaattcact actgtcacag gcctcccctc tggaatgcca tttacatcac aggtgaattc
4681 aatttgtcac atgatcctct ttgcctactg cgtgcgggcg gcctatgacc aggctaacgt
4741 accatactca tcaaatgttt tcaacacaga gaccatattc acatatggtg atgatgggct
4801 gtacgtactt acggaggcta cacactccct tatgccacaa attgttgggg agatgtgcaa
4861 ggtggggcta aaacccactt caccagacaa gtcaccaacc atcactgaag taagtggcga
4921 cccagtattt cttaaaaggt cactccatcg tgatcacaga ggcaggtgct gggcacggtt
4981 ggacaaatct tccctcatgc gccagtgcta ttgggtcaag gcacagaaca cattagacgt
5041 gactttacca ccgcatattg atcaggttgc cagagcgcaa cagctagaca acgtttgcat
5101 ctatgcctcc cagtgggatg acagcactgc cacagagatc attgaccttg tgacaacaac
5161 tgctgaagtt gaaggtgtag ccctgtcaat gaatttactg tccctggcgc gtgctgagta
5221 cgagaagtgg tactgcggcc tgctacaggg gcagagccag gaaaaccctg aagcttccct
5281 gaagaaagtg ttcgtcatgg agggtgacga gcggcccagc cccggggctt cggccccggg
5341 gctggctggg cctgaggaca atggtcccct tgtggtgact gctcctcagc cggtggcccc
5401 agtgcaggca gcagcaatgg ctgcagcaac aggctcactc ccaagttcat taccacctga
5461 agtgcaggca acatgggtga cacttactaa catcacttgg aacacccggc aggggcctaa
5521 caccctactt ggggcactcc aacttggccc tggccttaac ccgtatgtgg cacacttgtc
5581 acagatgtgg actgcttggg gtggcagtat gctggtacgg ttgacagtgt caggtagtgg
5641 actctatgga ggccgcctac tggctgctgt tttgccgccc ggtgttaaca ctgcagatgt
5701 taacaaccca ggagcctttc cacatgttct tattgatgca agacaaactg agcctttcac
5761 aatcactata ccagacatcc gaccaacaga cttccacgtg gacggtgaca acattccaac
5821 ttgttccgta ggtctttggg ttttcaaccc attgattaac ccatttgggg gtaatgctgc
5881 agttgtgtct caggtataca tcagtgttga gactaagcca ggccccgatt ttgattttgc
5941 catgcttaaa ccaccaaacc agcgcacaac tgctggagag catccacgtc ccctcttgcc
6001 ccgtcggttg ggtacgtcac ggggcaatcg cacgggtggc tttgttagtg gtgggttgat
6061 agttcaacag tgggaccagg tgaaccacca ttgggatgtt gacagtgtca cctatgggtg
6121 gagtgtgggc ccagtgagcc cattagtgtg taacatcgac actggcaacc tcaccaacgg
6181 agtcgttact gttgatgctg atggcaaggg tccaatcatg gtcaatatcc caaacaattt
6241 cccagacttt tgtgcttcaa cggcaaactc aactggcaca tcgcctagca gctggcacac
6301 agctgctggg ccactaaata catttgatga tcactgggat gtggcagaac accaggtgtg
6361 gaacgctgta gcatgcgtat ctgacaaccc tggcacgaat gctggtacaa tcacccttgc
6421 cagtcaaatc aatgcagcca acatgtgcct tgtccgtaac tatgggcagc aagagcacac
6481 ttctggcaca aatgccatct tcacaccaac gtggctgcaa ggtcaagcat cagttaaccc
6541 cagtgtcaca cctgtttaca gtgtcaatcg ggcctatggg ccggctggtc caaatcaaat
6601 tttcttgtgg tgtgaggaat tccttcggga ttaccctcaa cgctcagtag tttactgtag
6661 tcaattagga ttaactgcca acttattaga acatgcaaac tattacatac cccaaaacaa
6721 ttttgcagtt tggcaggttg acactggtgg gaacaccttt cagcttggga tgacgcgcac
6781 tggcgtgttt tacactggag gtgctgctgg aaccacagta aatctgactc ctgagactac
6841 ctttgagttt gtgggattct tccctatcag cacggcactc atgggaccag ttagtgccac
6901 aggcttcaga catggttagt tgggctgcag gcatcaacgc agctttgaac atcgctcttg
6961 gtgcagcagg ggtggcgagc aacattgtta accaaaccca agtcaatcag gcaaacaagg
7021 atttgctcaa aattcaacaa caattggcac aatcccaaat tgcagcacaa tctgaacaaa
7081 tgagttacta caaattgatg aatgacccag ttgagcgctt ccagcgtgct gttcaagcag
7141 gctatggagt tgactcagca gcccagttcg ctgggcggtc tgccccccac
//
LOCUS Flavivirus-YN-CHN-2020 6584 bp RNA linear VRL 07-JAN-2021
DEFINITION Pestivirus isolate Flavivirus-YN-CHN-2020.
ACCESSION Flavivirus-YN-CHN-2020
VERSION
KEYWORDS .
SOURCE Pestivirus
ORGANISM Pestivirus
Viruses; Riboviria; Orthornavirae; Kitrinoviricota; Flasuviricetes;
Amarillovirales; Flaviviridae.
REFERENCE 1 (bases 1 to 6584)
AUTHORS Han,Z., Xiao,J., Song,Y., Lu,H., Zhang,K., Li,J., Si,F., Sun,Q.,
Wang,D., Zhu,S., Yan,D., Xu,W. and Zhang,Y.
TITLE Large-scale screening for SARS-CoV-2 from specimens of several host
species and highly diverse RNA viruses
JOURNAL unpublished
REFERENCE 2 (bases 1 to 6584)
AUTHORS Han,Z., Xiao,J., Song,Y., Lu,H., Zhang,K., Li,J., Si,F., Sun,Q.,
Wang,D., Zhu,S., Yan,D., Xu,W. and Zhang,Y.
TITLE Direct Submission
JOURNAL Submitted (07-JAN-2021) National Institute for Viral Disease
Control and Prevention, Chinese Center for Disease Control and
Prevention, No. 155, Changbai Road, Changping District, Beijing,
Beijing 102206, China
COMMENT Bankit Comment: ALT EMAIL:hansir8@qq.com
Bankit Comment: TOTAL # OF SEQS:20
##Assembly-Data-START##
Assembly Method :: Trinity v. 2.8.4; Sequencher v. 5.0
Assembly Name :: metagenomic assembly
Coverage :: 90
Sequencing Technology :: Illumina
##Assembly-Data-END##
FEATURES Location/Qualifiers
source 1..6584
/organism="Pestivirus"
/mol_type="genomic RNA"
/isolate="Flavivirus-YN-CHN-2020"
/isolation_source="anal and throat swabs"
/host="Malayan pangolin"
/db_xref="taxon:11095"
/country="China"
/collection_date="20-Feb-2020"
gene 1..20
/gene="partial genome"
CDS 21..6582
/codon_start=1
/product="partial polyprotein"
/translation="MTNLVSRVIASLIEVSWSGLGGEIGVLYKTYLLSSNIKKLIIKH
KVNNPGVRKWFSEEEIFGMPKIYMVTSIRNLTKDKAILCSVCENSSSNRKCPKCGSKG
TPIKCGMTLSEFEERFYTKIFITEYNQDDCRVEGPGKIVRYVDNGLLYLRNLPILATK
QKMLIVGNLGNEIADLEYLGWTLRGPAVCKKVTQSTKCQISILDKLTAFFGIMPRGAT
PRAPTRFPVSLLRIKRGFENGWAYTHPGGISSVHHVTEGKDLFVTDDMGRTKVVCQST
NKTSDETEYGIKTDGACPEGTRCYAFNPEATNISGTKGAMVHLRKTGCEFNCVTAMGT
PAYFDLKHLKGWSGLPIFEAGTGKIVGRVKAGKNKEGDPTVIMSGVQVAKPTECDLET
IASKISKMQRGEFKQVTLATGAGKTTELPRRVIEEVGRHKRVLVLIPLRAAAEGVYRY
MKCKYPSIAFNLRIGELKEGDMATGITYASYGYFCQMEMPKLKNAITSYNYVFLDEYH
CATAEQLAVMSKIHRFSEEVRVVAMTATPAGTVSKAGQRHTIEEIQLSEVLRGEDLGD
EYINIADLKVPIKELKNNCLVFVPTRKMAAENAKNLVSKGYNAGYFFSGEDPTTIRNI
TAKSPYIVVATNAIESGVTLPDLDTVIDTGLKYEKRIRINDKMPYIVTGLKRMAVTIG
EQAQRKGRVGRVKPGRYLKGPTTASGEKDYHYDLLQAQMYGVQDGINITKSFREMNYD
WCLYEMDTLTVSQLEVLNNVILSRDLPIATKNMLARTTHPEPIQLVYNCSECPVPVLF
PLIKSGEVTDKYETYELMNCRKLNNDPPAYIYSTEDEDLAIDLLNLAWPDPTQQETIE
AAQALKQLQGLSSGETALLVALFGWVGYQALTKRHIPIITNIYQIEDQKLEDTTHMQY
APDDIHAGGEVELENLRSNDIMNMVDKAKEYVMNGIEFVKYQSEAIYNKGVDPNTMQT
GKKLWQQIREYLQANEREITKYGLWGVHTAFYNSVKARLGHETAFATLVIKWIAFGEA
GINPLVKQVATDLIVYYVMNKPSYEGDTETQKEGKKFVAATMVSALASYTFNNYSQGK
LKELVEPALSYLPYATKILSLFAPTRLESCIVLSTAIYKTYLGIKKGKSEGLAGVAAS
AAMELMNQNPISIAIAVALGVGGIAAHNAIESSETKRTLLMKVFVKNFLDQAATDELI
KENPEKIILSLFEAVQTIGNPIRLIYHLYAIYFKGWSAKEIAEKTAGRNIFTLVVFDG
LEMLGLDKEGSWRNLSSNYILDAINDLLRRLAQAPKMVLRRVISSLLPAPFSCTTYDR
DCRIGWQSADFDEMEVNCTCGYSRRAMKIGGSLQTLDESGSQFCRNRSITYSMGNIKT
TVFRKDHIVIPICAKLAGLAQIHYNGCSIEVEMNEGGKIKRTSEWEVGHRTIERCLES
WQGIKYGTSSLGIEPFHKKDPIIRTEATITKDKVVFIKMQKGCAYTRDLTIANLKQLI
HLVHKNKLPEAVIPEVEAKTWISEPLVDERLGTIKPKFGEIVIPEEDDSLNLLGPDVI
VNDSELQVNTAQGKKAGRLGPISFELSQIGGNIKLGFGENQHPGKELSKVPLFEKILS
TKQKPYTLVFGNKNRVSNRSRTGNFNQLVTDSRRYLKKMALEGNVIFIQVGNQIHESL
QGVADYVVPFLTRDLIEAFSLGRTRSIKLNREQLDLLLEKSEGSHYDLPRWLHDEDPK
FLDISVKGEHYHLVGTIEQLKEEAKRLGATKDTKVQTTSVKGTYQVQLSSWWENERTS
DFEPLFRELMMKCAPTNRMRQVHYAAPSQISKGNLLPLFPEVWQGLIPVKKQKIHPYE
AYTTLLQMVRTMKMTHTNEPIIKEHNKWILSKIQQPSKLNLEKLVAPGALEYPAEKNK
KKHNIYNLRISGVMQAVGIDLNKLPVVRSQVDTKSFHESIKDKIDKKPNLQNPDLHDE
LFKVFQTCKVKELQGKLDEVDWQTLEIGLNRKGAPGFLERENIGELVSTAAGKKRVEN
IIQNLRLGKHIKYYETAIPKNEKRSVTDDWLEGDYIEEKKPRVIQYPEAKTRLAITKV
MFNWVKQKPILIPGYEGKTPIFNLFNKVHKEWRQFKDPVAVSFDTKAWDTQVTPKDLL
LIAKIQKFYFKEKWHRFLDTLTDHMLEVPVITEDGQVYLRVGQRGSGQPDTSAGN"
gene 6583..6584
/gene="partial genome"
BASE COUNT 2418 a 1172 c 1481 g 1513 t
ORIGIN
1 taattaatga actggcaggg atgacgaacc ttgtttcaag agttatagca tctttaatag
61 aagttagttg gagtggacta ggtggagaga tcggggtgct atataaaaca tacctactaa
121 gttcaaacat aaaaaaactg attattaaac acaaagtgaa caaccctgga gttcgcaaat
181 ggttcagtga agaagagatt tttgggatgc caaaaatata tatggtcacc agtataagaa
241 acttaaccaa agataaggcc atactttgtt ctgtctgtga gaacagcagt agtaacagga
301 agtgcccaaa atgtggaagt aaagggacac ccattaaatg tgggatgacc ttatcagaat
361 ttgaagaaag attctacaca aaaattttta taactgagta caaccaggat gactgcagag
421 tggaagggcc gggcaagata gttaggtatg tagacaatgg gctactgtac ttaaggaacc
481 tccccattct agccactaag caaaagatgt taatagttgg aaacctaggc aatgaaattg
541 cagatctaga gtatttagga tggaccctta gggggccagc agtatgtaag aaggtaactc
601 aaagcactaa gtgccagatc tctattctag acaaactaac agcctttttt ggtattatgc
661 ctagaggtgc caccccaagg gcccctacca gattccccgt atcattacta aggatcaaaa
721 gaggttttga aaatggatgg gcatataccc acccaggggg tattagctct gtccaccatg
781 tcactgaagg aaaagactta tttgtaactg atgacatggg cagaactaaa gttgtctgtc
841 agtcaactaa taagacatct gatgaaactg aatatggaat aaaaactgat ggtgcttgcc
901 ccgaaggcac caggtgttat gcatttaacc cagaagccac caacatctca ggaaccaaag
961 gagccatggt acacttaaga aaaacaggtt gtgaattcaa ctgtgtaact gctatgggca
1021 ccccagcata tttcgaccta aaacatttga agggatggtc aggcctacca atatttgaag
1081 ctggaacagg aaaaatagtt gggagagtta aagccggaaa aaacaaagaa ggtgacccta
1141 cagtgattat gtcaggggtg caagttgcca agccaaccga atgtgatttg gaaaccatag
1201 ccagcaagat atctaaaatg caaagaggag aattcaaaca agtcactcta gcaactggag
1261 ctgggaagac cacagaacta ccacgtagag tgatagaaga agtaggtaga cataagaggg
1321 ttttggtgct cataccactc agagcagctg cagaaggagt ttacagatac atgaagtgca
1381 agtacccaag catagctttt aatttgagaa ttggggagct caaagaagga gacatggcta
1441 ctggaataac ctatgcctca tacggttatt tctgtcagat ggaaatgcca aaattaaaga
1501 atgcaatcac ctcttataat tatgtattcc ttgacgaata ccattgtgca acagcagaac
1561 aactagctgt gatgagcaag atacaccggt tctctgaaga agtgagggtg gtggcaatga
1621 ccgcaacccc tgcaggaaca gtcagtaagg caggtcagag acacaccatt gaagaaatac
1681 aattaagtga ggtattaaga ggcgaagacc tgggtgacga gtacataaat atagctgact
1741 taaaggtccc tattaaagaa cttaaaaaca actgtctagt ctttgtgccc acaaggaaga
1801 tggctgccga gaacgcaaag aacttggtta gcaaaggata caatgcaggg tatttcttta
1861 gtggagagga cccaacaaca ataagaaata taacagccaa gagcccctac attgtagtag
1921 cgactaacgc cattgaatca ggtgtgacgc taccagacct ggacacagtt atagacacag
1981 ggttaaaata tgagaagaga ataaggatta atgacaagat gccttacata gtaactgggc
2041 tcaagagaat ggccgttaca atcggggaac aagcacaaag gaaaggaaga gtgggaagag
2101 taaaaccagg tagatactta aaaggtccta caacagcaag tggggaaaaa gactaccatt
2161 atgatttgtt acaagcacaa atgtacgggg tacaagatgg aataaacata accaagtcct
2221 tcagagagat gaactacgac tggtgcctgt atgagatgga cacattaact gtcagtcagc
2281 tggaggtgct taataatgtg atcttgagta gggatctacc aatagctaca aaaaatatgc
2341 ttgcaagaac aacgcaccca gagccaatac aactggtata caactgctct gaatgtccag
2401 tacccgtatt attcccctta attaagtccg gtgaggtcac tgacaaatat gaaacatatg
2461 aactcatgaa ctgtagaaaa ttgaacaatg acccaccagc atacatatat agtacagaag
2521 atgaagacct ggcaatagat ttgttaaact tggcttggcc ggaccctacc caacaagaga
2581 ctatagaggc agcacaggca ttaaaacaat tgcaggggtt aagttctgga gagacggctc
2641 tattagtggc attgttcggg tgggttgggt atcaagcatt aaccaagcga catataccca
2701 taattaccaa catatatcaa attgaagacc aaaaattgga agacacaact catatgcagt
2761 atgctccaga cgacatacat gctggagggg aagtagaact ggaaaattta aggtccaacg
2821 acatcatgaa catggtagac aaggccaaag aatatgtgat gaatggcata gaatttgtaa
2881 aatatcagtc agaagcaatt tataacaaag gggtagaccc aaacactatg caaacaggga
2941 aaaaattatg gcaacaaatt cgggaatatt tacaagctaa tgagagagaa ataaccaagt
3001 acggcttatg gggtgtgcac acagcctttt acaacagtgt taaggctaga ctaggacatg
3061 aaaccgcatt tgcaacacta gtaataaaat ggatagcctt tggtgaagct ggaattaatc
3121 ctttggtaaa gcaagtagcc acagatttga ttgtatacta tgtaatgaac aagcctagtt
3181 atgaaggaga tacagagact caaaaagaag gcaagaaatt tgttgcagca actatggtga
3241 gtgccttagc cagttatact tttaacaatt atagccaagg gaagttaaaa gaattggtgg
3301 agccggcact atcctattta ccgtacgcaa ctaaaatact gtcactattt gcccccacaa
3361 gactagagtc atgtatagtg ttaagtacag ctatatataa aacctaccta gggataaaga
3421 aaggtaaaag tgaaggattg gctggagtcg ccgctagtgc cgcaatggaa ttaatgaatc
3481 aaaacccgat cagtattgct atagcagttg ccctaggtgt tggagggata gcagcccaca
3541 atgctataga gagtagtgag actaaaagaa cactattaat gaaggttttt gtaaaaaatt
3601 ttttagacca agcggctact gatgagttaa taaaagagaa cccagaaaaa ataatactat
3661 cactttttga agctgtacag acaataggaa accctataag gctaatttac cacctatacg
3721 caatatattt taaaggatgg tcagctaagg agatagctga aaaaactgcc ggtagaaata
3781 tattcacact ggtagttttt gatggtcttg agatgctggg cttagacaag gaaggctctt
3841 ggaggaactt aagcagcaat tacatactgg atgccataaa tgacttacta agaagattag
3901 cacaagcacc aaaaatggta ttaagaagag taatatcatc actcctacca gccccatttt
3961 catgcaccac ttatgatagg gactgtagaa tcggctggca gtcagctgac tttgatgaaa
4021 tggaagtaaa ttgcacatgc ggatactcaa ggagagcaat gaaaattgga ggaagtctac
4081 aaactttgga tgaaagtgga tcacagtttt gtaggaatag gtcaataacc tacagtatgg
4141 gtaacatcaa gacaactgtt tttaggaagg accacatagt aatcccaata tgtgcaaagc
4201 tagccgggtt ggctcagata cactataatg ggtgcagtat agaagttgaa atgaatgagg
4261 gcggaaaaat caagagaact agtgaatggg aagttggcca caggaccata gaaagatgtt
4321 tggaaagttg gcaaggcatc aagtatggca catctagcct gggcatagag ccattccaca
4381 agaaggatcc aatcatcaga acagaggcaa ctataacaaa agataaagtg gtttttatca
4441 agatgcaaaa agggtgtgcc tatactaggg atttgacaat tgcaaatctt aaacaactaa
4501 tacacttggt ccacaagaat aaactacctg aagcagtcat accagaggtg gaagccaaaa
4561 catggatatc tgaaccatta gtagatgaaa gattaggaac tataaaacca aaatttgggg
4621 aaattgtcat acctgaggaa gatgactcat taaacttatt aggaccagat gttattgtta
4681 atgatagtga attgcaagtt aacaccgcac aaggaaagaa ggcaggaaga cttgggccaa
4741 ttagctttga actatcccaa atagggggga atattaaact aggattcggg gaaaaccagc
4801 accctggaaa ggaacttagc aaagtcccat tgtttgaaaa aattctatca acaaaacaga
4861 agccgtacac actagtattt ggcaacaaaa atagggtttc taatagaagt agaacaggaa
4921 actttaacca gctggtcaca gactctagaa ggtacttgaa gaaaatggct cttgaaggta
4981 atgtgatatt cattcaagtg ggcaaccaga tccatgagtc acttcaaggg gttgctgact
5041 atgtggtacc ctttttgacg agagacttga tcgaggcttt cagtttgggc cggacaagaa
5101 gtataaaact taatagggag caacttgacc tgttattgga aaaatctgaa gggagtcatt
5161 atgacttgcc aagatggtta catgatgaag acccaaagtt cttagatata agtgtgaaag
5221 gggaacacta tcacttagta ggcaccatag agcaattgaa ggaagaagca aaaagacttg
5281 gtgcaactaa agacactaaa gtgcaaacga cttcagtaaa aggcacctac caagtccaac
5341 taagcagttg gtgggaaaat gagagaacta gtgactttga accccttttc agagaattga
5401 tgatgaaatg tgcaccaact aacagaatga gacaggtaca ctatgcagcc ccttctcaaa
5461 tctctaaggg gaacttgctt ccccttttcc cagaagtatg gcaaggactg ataccggtta
5521 aaaaacagaa aatacatccc tacgaagcct acaccacttt gttacagatg gtaagaacta
5581 tgaaaatgac acataccaat gaacccataa tcaaggagca taataaatgg atcctgagta
5641 aaatacaaca accatccaaa ctaaatttgg aaaaactggt agcaccaggt gcattagaat
5701 acccagctga aaaaaacaaa aagaaacaca acatatacaa cttgcggata agcggggtca
5761 tgcaggcagt tggcattgat cttaataagt taccagtagt aagatcccaa gttgatacaa
5821 aaagtttcca tgaatcgatt aaagacaaaa tagacaagaa accaaatttg caaaatcccg
5881 acctgcacga tgaattgttt aaagtatttc aaacatgtaa agtaaaagag ttgcagggta
5941 aattagacga agtagactgg caaacccttg aaataggatt aaatagaaaa ggggcccctg
6001 gctttcttga gagagaaaac ataggcgaat tggttagcac ggcagcaggg aagaagagag
6061 tcgaaaatat aatacaaaat ttaaggttag gaaaacatat aaaatactat gaaacagcaa
6121 tcccaaagaa tgagaagagg tctgtgacag acgattggct agaaggagat tatattgaag
6181 aaaagaagcc tagggttatt caatatcctg aagctaaaac tagactagct ataacaaaag
6241 taatgttcaa ttgggtaaaa cagaaaccta tacttatacc aggttatgaa ggaaagacac
6301 ctatcttcaa cctattcaat aaggtacata aggaatggag gcaattcaag gaccccgtcg
6361 ccgttagctt tgataccaag gcttgggaca ctcaagtcac cccaaaagat ttactgttga
6421 tagctaagat acaaaagttt tactttaaag aaaagtggca cagattccta gataccctaa
6481 cagaccacat gcttgaagta ccagttataa ctgaagatgg tcaggtctac ctgagagttg
6541 ggcaacgagg cagtggacaa ccagatacaa gtgcaggtaa cagc
//
LOCUS YN19-Cali-YN-CHN-2020 8312 bp RNA linear VRL 07-JAN-2021
DEFINITION Vesivirus isolate YN19-Cali-YN-CHN-2020.
ACCESSION YN19-Cali-YN-CHN-2020
VERSION
KEYWORDS .
SOURCE Vesivirus
ORGANISM Vesivirus
Viruses; Riboviria; Orthornavirae; Pisuviricota; Pisoniviricetes;
Picornavirales; Caliciviridae.
REFERENCE 1 (bases 1 to 8312)
AUTHORS Han,Z., Xiao,J., Song,Y., Lu,H., Zhang,K., Li,J., Si,F., Sun,Q.,
Wang,D., Zhu,S., Yan,D., Xu,W. and Zhang,Y.
TITLE Large-scale screening for SARS-CoV-2 from specimens of several host
species and highly diverse RNA viruses
JOURNAL unpublished
REFERENCE 2 (bases 1 to 8312)
AUTHORS Han,Z., Xiao,J., Song,Y., Lu,H., Zhang,K., Li,J., Si,F., Sun,Q.,
Wang,D., Zhu,S., Yan,D., Xu,W. and Zhang,Y.
TITLE Direct Submission
JOURNAL Submitted (07-JAN-2021) National Institute for Viral Disease
Control and Prevention, Chinese Center for Disease Control and
Prevention, No. 155, Changbai Road, Changping District, Beijing,
Beijing 102206, China
COMMENT Bankit Comment: ALT EMAIL:hansir8@qq.com
Bankit Comment: TOTAL # OF SEQS:20
##Assembly-Data-START##
Assembly Method :: Trinity v. 2.8.4; Sequencher v. 5.0
Assembly Name :: metagenomic assembly
Coverage :: 90
Sequencing Technology :: Illumina
##Assembly-Data-END##
FEATURES Location/Qualifiers
source 1..8312
/organism="Vesivirus"
/mol_type="genomic RNA"
/isolate="YN19-Cali-YN-CHN-2020"
/isolation_source="anal and throat swabs"
/host="Paguma larvata; Callosciurus erythraeus;
Prionailurus bengalensis; Mephitis"
/db_xref="taxon:95337"
/country="China"
/collection_date="23-Feb-2020"
5'UTR 1..13
CDS 14..5851
/codon_start=1
/product="ORF1 protein"
/translation="MASKATSSTLTKYFSVVDVHKRALRTSTPEITQWVDSKGFHVDF
KSWRGVQIFTRLASASLGVKVTGTSARGYIQDVQNIALSLSGVTGNADSTAECQNITS
SVCAVTGNADCCSQISLALGVTGNADSRMCTLEHYHKVTGNVDFGIVNDWAVQGNDIT
PENFGTVLRMLINGFTFSVRDALLTKDHQELRAEACPSCDLYDKCPVCNSKEINDDGT
SSSPETIPDWTHHTIESGITNLLSDGLDSMKESDLSNIAAHLRKAFETSSHPANQDMS
KDQLHWLINMAEAGMKRKVDLGNVPMYNSRIQARRDWRNKLFNEPIDKLVQMATTTKD
TIMKSAIWTILIEKASNAKHYSQDIFDKVKNTIGNFTTDTTNEFFKVIVSSMISHMRY
FLIDSPDPITNLPGFILRLKPLNLQMIIENHESTLEGWIITLTALAELYGFLDFAINL
IPQIVQTFFDLLSTCTQKCYSMIRDLLTSTFKAESLDLKNPFWYAISAFVVYFVTGFL
PNNAKMTAIKQVLGGANTLIAGILAIQKLSAMFASWSSESVVNDISVRVIGLTESNNP
TVTQDMDAVCNLQSLAEKLREEIKLKTLDPTFQPYLPILRNLLSTVDGVVSSCAKRKA
IATQRVAPVAIILTGPPGCGKTTLAYELAKRLSNQKPSILNLSIDHHDAYTGNEVCII
DEFDSNSKVDYVNFVIDMVNTNPMLLNCDMIENKGKVFSSKYVIMTSNNETPVTSTST
RAPAFYRRVRIIDVTNPQVMQFKYQNPGQPVPSYLYNANFSHLEMSMRGLGAYSKENV
IDPIGRDAKGLPAPQPDRVNVETLVRHMKMNYQQNALTFRTESRPKAKVPTFAFICNQ
ESIQAVKKLLQSAQITYNGNFTIAEGPCNTTPVNAGCGSRVFVVTPEEADQIQGCKKF
HVNTAKILRYPELALIEGDNFRTALGVCMSNQDVTDMFYYIHGKSVNDRVSLDKLPAN
QNVVTVHNVYDIVWALSKHLSITGKFQAIKALYELLMTPDTLPVALRNWMDSTSFSQD
HVVTQFIVPGGTVILESCHGARMWATKGRVIRAGGVSATGGPEGGLRFLGTGIRNLPW
SEIFREFLNLLSLLWSKIKGATLVLGVLAMYFRRNRPTAESKGKNKHGRGAVRGAGKG
ITLSDDEYDEWREYNFDKRNNLTVEDYLQLRNRAAMGSDDAEAVKFRYWYTMRQMRDQ
PGYDVEYATIIGKSGARDELVRTQMMKAPRNKKRDNLDDNPFSYYAEAEGKVQHANAI
IPVTLVDGSRVGHAVHLGHGVCISLKHVLATGDYVLGQKARDVVYDGELAHFRIDTYP
KSAAPTGTGKPVKDPWGNVASTEWKHDVYSTSAGKMYGSIVFTNQKTAPGDCGLPYVD
DRGCVVGLHAGSGGDQAPGKKIVIPYIKRKGYYKDSMKKFWREESPTISHKGLLCQET
KDGRRVIGGTVLHVSPAHVDDYQNCSHQPANLGSSDPRNPISLHSIVVNNLQPYKERT
PGPPTQILSRAKKMLIKTLEPFIPKTDEVLGMTEAFFKLNHDTSCGPYIGGRKKDHIN
SETKEISKQLLDHLSARWEVASKGLAIPHEYAVGLKDELRPVEKIAEAKRRLIWGCDV
AVATVAAAAFKSVSDSIMAMHEIGFIQVGINMDGPAIETLFKRLYPSGHQRYCVDYSK
WDSTQPPNVTSESLDILKHFSANHPIVDSAVATLSSPAIAVFDGVSFKTSGGLPSGMP
LTSILNSLNHCLLVGCAIIQALEYRGIDVNWNIYDSIDMFTYGDDGVYIVPPLVDSVM
PAVFDNLKTYGLKPTRTDKSNQPIEPVPQGVPVEFLKRSFVRNENGIRALLDRNSLLR
QFYYIKGKNSMNWTEPPSEINVSSRSAQLWNVCLYASQHGPEFYSKVADLMNRAIDYE
GLVIETPSYLEAVTRYNAYFNGVESNLVQMLSSDQPGLDKTVFEN"
CDS 5857..7896
/codon_start=1
/product="ORF2 protein"
/translation="MPRPQRSYKSQRKAYSKALGRRFGWKSCPLGTLDFFYDEETACC
DDPFHCCHEEVMDDIGYELFYLDTDPDEACFLHSVSNFIPWESGWTFPAAPPFNLMGG
FFLATKPGVVIQRCLEKVALPGVLHFSAGFTPFYTHEDVVFRAESAAAGNPEITTEEQ
GSVVATGPQPSASGMTTLASAATGTQEAEWKLFFAYHTSMNWSTRDGSGKVLFSQALS
PKLNPYLKFLSQIYSAWAGSIDVRFTVSGSGVFGGKLAAVVVPPGVDPSGGTSLLQFP
HVLFDARQTDPVIFNIPDIRKILWHGMEDTDTSTLVIIVYNELINPYHSGADATDCTI
TVETRPGADFSFNLMKPPTRILKSGKEPSDLIPKSSLLWEGNRAPGTIVTFAINPTIG
QANRHFDSNRSTYGWSSPRHGDILCQVTGQSNKRVFPVGPGDSHMLVPSVPDGWPDYT
SNESWDVGTSTLTSYDKLTYGLVSACLQYTGANQGNGSIAKHAVIGVGTRNDSNGIDP
SNKLWVNNLAFVYPEGITTNTKFKLRPMMVIRKDINGRPVGDNLSQVAYYDKLPTATT
LNGNYPLYYVNWMMCNYGNQGIQVYNSQILTTSANFAQDNYNIGPDSFAVYRIKDSTG
RWFDVGISADGFSYVGSFVLNFSALSAPYTASYMGIQSNGNPLAHNVDAGQSRTI"
CDS 8127..8303
/codon_start=1
/product="ORF3 protein"
/translation="MVSKLNVQGPALQAQAMADHGFRNNLYSNGRQLTYAELNQAMSA
AATRFYKPTFQTDQ"
3'UTR 8304..8312
BASE COUNT 2323 a 2093 c 1795 g 2101 t
ORIGIN
1 gtaaaatagg actatggcct caaaagccac ttcctcaact cttacaaaat acttcagtgt
61 tgtagacgtg cacaagcgcg ctctacgcac ttcaacccct gagatcaccc aatgggtgga
121 ctcaaagggt ttccacgtcg acttcaaaag ttggcgcgga gttcaaatct tcaccaggct
181 cgcttcggcg agtcttggtg tcaaggtcac aggcactagt gcccgtggct acattcaaga
241 tgttcaaaac atcgcactct ctctcagcgg agtaactggt aatgcggact ccactgctga
301 gtgccagaac atcacctcat ctgtttgcgc agtaactggt aatgcggact gctgctcaca
361 gatctccctt gcccttggag taactggtaa tgcggactcc agaatgtgca cccttgaaca
421 ctatcacaaa gtaactggta atgtggactt tgggattgtg aacgattggg ctgtgcaagg
481 caatgacatc acccctgaga acttcggaac tgtcttacgg atgctgatca acggatttac
541 cttctctgtt agagacgccc tgctgaccaa agatcaccag gaactccgag cggaagcatg
601 cccatcatgc gacctctatg acaagtgccc tgtgtgtaac tccaaagaaa tcaatgacga
661 tggaacaagc tcttcaccag agaccatccc agattggacc caccacacaa tcgaatcagg
721 aatcaccaac ctcttgtctg atggacttga ctcaatgaaa gaatctgacc tctccaacat
781 tgcagctcat ctcagaaagg ccttcgaaac atcatctcac cctgccaatc aggacatgtc
841 gaaagaccaa ctccattggt tgatcaacat ggctgaagct ggcatgaaaa gaaaggtcga
901 cctcggaaac gtacccatgt acaactcgag gattcaggca cgaagagatt ggcgtaacaa
961 actcttcaat gaaccaattg acaaattagt gcaaatggca acaacaacaa aagacacaat
1021 catgaaatca gcaatctgga ccatccttat cgaaaaagcc tcaaatgcca aacactactc
1081 ccaagacatt ttcgataagg tcaaaaacac aattggcaat ttcacaactg acacaacaaa
1141 tgaattcttc aaagtgatag tctcatccat gatctctcac atgaggtact tcctcatcga
1201 ttctcctgat cctatcacca atctaccagg tttcattctc cgtctcaaac ctctcaatct
1261 tcagatgatc attgaaaacc atgaatcaac tctcgagggc tggatcatca ccctcactgc
1321 tcttgctgag ctgtatggat ttcttgattt tgccattaac ctcatacccc agattgtgca
1381 gacattcttt gatcttctct caacctgtac tcaaaagtgc tactcaatga ttagggacct
1441 tctcacttct actttcaaag ctgagtctct tgacctcaag aatcccttct ggtatgcaat
1501 ctctgctttt gtggtttact ttgttactgg ttttctcccc aacaatgcga aaatgaccgc
1561 catcaagcaa gttcttggtg gcgcaaacac tctcattgct ggaatcctcg caatccagaa
1621 actctctgca atgtttgctt cttggtctag tgaatctgtt gtgaatgaca tttctgtgcg
1681 tgtgattgga ctgactgaat ctaacaaccc aactgtcacc caagacatgg atgctgtgtg
1741 caatcttcaa tcccttgccg aaaagcttcg cgaagaaatc aagctcaaaa cacttgaccc
1801 cacattccaa ccatatcttc caatcctaag aaatctcctc tccaccgttg atggtgtggt
1861 ttcctcttgt gctaagagga aggccatcgc cactcagcgt gtagcccctg ttgccatcat
1921 tctcactgga ccaccaggtt gtggtaagac aacacttgct tacgaattgg caaaaagact
1981 ttctaatcaa aaaccttcca tcctgaacct gtcgattgac caccacgatg cctacacagg
2041 caacgaggtc tgcatcatcg acgagttcga ctcaaattca aaagttgact acgtcaattt
2101 cgttatcgat atggtcaaca caaatccaat gttgctcaat tgtgacatga ttgaaaacaa
2161 aggcaaggtt ttctcaagca agtacgtcat catgacttct aacaatgaaa cacccgtgac
2221 gtcaacctca acgcgagctc cagccttcta caggcgtgtt cgcatcattg atgtcacaaa
2281 cccccaagtc atgcagttca aataccaaaa ccctggacaa ccagtaccta gctatctcta
2341 caatgctaac ttctcacacc tggaaatgtc aatgagggga ttgggagcct acagcaagga
2401 aaacgtgatc gatcctatcg gtcgcgatgc aaaaggctta cctgctcccc aaccagacag
2461 agtgaacgtt gaaacattgg tcagacacat gaaaatgaac taccaacaaa atgcactgac
2521 tttccgcact gaatcaagac ccaaggcgaa agtcccaaca tttgcattca tctgcaatca
2581 ggaatcaatc caagcggtga agaagctgtt gcaatccgca cagatcacct acaacggcaa
2641 cttcacgatc gcggaaggac cctgtaacac gacaccagtt aacgctggtt gtggttcaag
2701 ggttttcgtg gtcacaccag aagaagccga ccaaattcaa ggctgtaaga aattccacgt
2761 caacacagcc aagatcctga gatacccaga attggcactc atcgaaggtg acaacttcag
2821 gactgctctt ggagtttgca tgagtaatca ggatgtgaca gacatgttct attacatcca
2881 tggtaaaagt gtgaacgaca gagtgagcct ggataagttg cctgcgaatc aaaatgtggt
2941 tacagttcac aacgtctatg acattgtctg ggcactttcc aaacatcttt ctatcactgg
3001 aaaatttcaa gctatcaaag ccctctatga actcctcatg acccctgaca ctctcccagt
3061 tgctctccgc aactggatgg actccacttc cttctcccaa gaccatgtgg tgactcagtt
3121 tattgtgccg ggaggcacag tgatacttga gtcgtgccat ggtgcacgga tgtgggcaac
3181 caaagggcgt gttatccgcg ctggtggtgt gtctgcaact ggtggaccag aaggaggctt
3241 acgcttcctt ggcaccggaa tcaggaacct cccatggtct gaaatcttca gggaattcct
3301 caatcttctc tcacttctat ggtccaagat caaaggtgca acccttgtgt tgggtgttct
3361 tgcgatgtac tttcgcagaa acagaccaac agctgaaagc aaggggaaga acaaacacgg
3421 ccgtggcgct gtgcgaggcg ctggcaaagg aatcaccctc tcagatgatg agtatgacga
3481 gtggcgggag tacaactttg acaagcgcaa caaccttaca gttgaagatt acctgcagct
3541 caggaaccga gctgcaatgg gatctgatga tgctgaagct gtcaaattcc gctactggta
3601 cacaatgagg cagatgcgtg accaacctgg ttacgacgtg gagtacgcca ccataattgg
3661 caagagtggt gcgcgtgacg aacttgttcg tactcaaatg atgaaagctc cacgaaacaa
3721 aaagagggac aatctggatg acaacccatt ctcttactat gctgaagccg agggaaaggt
3781 tcagcatgcc aatgccataa tacctgtcac actggttgat ggctcgcgtg tgggacacgc
3841 tgtacatctt gggcatggtg tttgcatctc gctcaagcat gtgttggcca caggagacta
3901 tgtgttggga cagaaggcgc gagacgtcgt gtacgatggt gaactcgcgc atttcagaat
3961 tgacacgtac ccaaaatctg ctgcacctac tggcactggc aagcctgtga aggatccgtg
4021 gggcaacgtc gcatccaccg agtggaagca cgatgtctac agtacttcag caggcaaaat
4081 gtatggatca attgtcttca ccaaccagaa aacagcaccc ggagactgcg gtttaccgta
4141 cgttgatgac cgcggatgcg tggttggcct gcatgcaggc tcaggtggag accaagcacc
4201 tggcaagaaa attgtgattc catacatcaa gagaaaggga tactacaagg atagcatgaa
4261 gaaattctgg agggaggaga gtcccacaat cagccacaag ggacttctct gtcaagaaac
4321 aaaagatggc agacgtgtaa ttggcggcac agttctgcac gtgtcacccg ctcacgtgga
4381 cgactaccaa aattgctctc accaacctgc aaatcttgga tcttctgacc cccgcaatcc
4441 tatctctttg cattctattg ttgtaaataa tcttcaaccc tacaaagaaa ggactcctgg
4501 gccccccact caaattcttt cccgtgctaa gaaaatgttg attaagactc ttgaaccttt
4561 tattcccaaa actgatgaag tactcggaat gactgaagct ttcttcaaac tcaaccatga
4621 cacttcgtgt ggaccctaca ttggaggaag aaagaaggac cacatcaatt cggaaacaaa
4681 agaaatcagc aaacaactcc tggaccacct ctctgcaaga tgggaggtag cttcgaaagg
4741 ccttgcaatt cctcatgaat acgcagttgg ccttaaggac gagctcagac cagttgagaa
4801 aattgctgaa gccaaaagaa ggctgatctg gggctgcgat gtcgccgtag cgaccgttgc
4861 agctgccgca ttcaagtcag tctcagattc gatcatggcg atgcacgaaa ttggatttat
4921 ccaagtcggc atcaacatgg acggacctgc aattgaaact ctgttcaaaa gattgtatcc
4981 aagtggtcat caacgctatt gcgtagatta ctctaagtgg gattccactc agcctccaaa
5041 cgtaacttct gaatcattgg atatcttaaa gcacttctca gccaatcatc ctattgttga
5101 ttctgctgta gctacccttt cttccccagc tattgctgtc tttgatggtg ttagtttcaa
5161 gacttcggga ggactaccgt ctggcatgcc tctcacctct atcctgaatt ccctcaatca
5221 ctgcttactg gtagggtgtg caataattca agctttagaa tacagaggta ttgatgtgaa
5281 ctggaacatc tacgactcca tcgacatgtt cacatatggc gatgacggag tgtacatcgt
5341 accacccctt gtagatagtg ttatgcctgc agtatttgat aaccttaaaa cctatggcct
5401 aaaacccacc cgtactgaca agtccaatca accaattgaa cccgtccctc aaggtgtccc
5461 tgtcgaattt ctcaaaagat ctttcgttag gaatgaaaat ggtattaggg ctttactaga
5521 taggaactct ctacttaggc aattctatta cattaaaggt aagaattcta tgaactggac
5581 tgaaccccct tcggaaatca atgtcagctc acgatctgca cagctctgga atgtctgtct
5641 ctatgcttct caacatgggc ctgaattcta ctctaaggtg gcagacctga tgaatcgagc
5701 aatcgactac gaaggtctcg ttatcgaaac cccctcttac cttgaagctg tcactagata
5761 caatgcttac ttcaatgggg tcgaatccaa cctggttcag atgctaagca gtgaccaacc
5821 cggactcgac aagacagtgt ttgagaacta ggcatcatgc cacgtcctca gcgctcttac
5881 aaaagtcaaa ggaaagccta ttccaaggcg ctcggaagac gctttggttg gaaaagttgt
5941 cctctaggca ctctcgactt cttctacgat gaagagactg cctgttgtga tgaccccttc
6001 cattgctgtc atgaagaagt catggacgac ataggctacg aactgtttta tctggacaca
6061 gaccctgatg aagcctgctt ccttcattct gtttctaact ttatcccctg ggaatctggc
6121 tggacctttc cggccgcacc gcccttcaac ctcatggggg gtttcttcct cgctacaaaa
6181 ccaggcgtcg taatccaacg atgtctggag aaagttgcac tgcctggtgt tcttcacttc
6241 agcgcagggt tcactccctt ctacacacat gaagatgttg tgtttcgtgc tgaatctgct
6301 gccgctggga atccagaaat tacaactgaa gagcaaggtt ctgtagttgc aaccgggcca
6361 caacccagtg cgtctggtat gacaacacta gcctctgctg caactggaac tcaagaagcg
6421 gagtggaaac tcttctttgc ttaccacact tccatgaact ggtccactcg agatggatca
6481 ggaaaggttc ttttctctca agctctatct cctaagctta acccttatct aaagttcctt
6541 tcacaaatct acagcgcatg ggctggatcc atcgatgtta gattcactgt ttctggtagt
6601 ggtgttttcg gaggaaaact tgctgctgta gtggttccac ctggtgtgga tccatctgga
6661 ggcacaagtc tactccagtt cccccacgtc ttgttcgatg cgagacaaac tgaccctgtc
6721 atcttcaaca ttcctgacat caggaagatt ctttggcacg ggatggaaga cactgatacg
6781 tctaccctgg tgatcattgt ttacaatgag ctcatcaatc cctaccacag tggcgctgac
6841 gccaccgact gcactatcac agttgagact cgacctggtg ctgacttctc tttcaacctc
6901 atgaagcctc caacaagaat tctgaagagt ggcaaggagc ctagtgatct cattcccaaa
6961 tcgtcacttc tttgggaagg aaacagagca cctggcacaa ttgtcacgtt tgccatcaac
7021 cccacaatcg gacaagcgaa ccgtcatttc gactccaatc gctcaaccta tggttggagt
7081 tctcccaggc atggggatat tctctgtcaa gtgactggac aaagcaacaa gagagtattc
7141 cccgtgggac ctggtgattc ccatatgttg gtgccatctg tccctgatgg ttggcccgac
7201 tacactagca atgagtcatg ggacgtcggt acaagcacac tgacgagcta cgacaaactg
7261 acctacgggt tggtttcagc ctgtctccaa tacactggag caaatcaagg caatggctca
7321 attgctaagc acgccgtgat aggcgttggg acaaggaatg acagtaatgg tattgaccca
7381 tccaacaaac tctgggttaa caatttggcc ttcgtttatc ctgaagggat aaccacaaac
7441 accaaattca aattgagacc aatgatggta atcaggaaag acatcaatgg aagacctgtt
7501 ggagacaacc tctctcaagt tgcttactat gataaacttc ccactgctac tactctcaat
7561 ggaaattacc ctctttacta tgttaattgg atgatgtgca attatgggaa ccaagggatc
7621 caagtctata actctcaaat ccttactact tctgctaatt ttgctcaaga taattataat
7681 ataggacctg atagttttgc tgtttatagg attaaggatt caactggcag gtggtttgat
7741 gtcggcattt ctgcggacgg attttcatat gtcggttctt ttgtacttaa cttctctgca
7801 ctttctgcac cttacactgc cagctacatg ggaattcaga gcaacggcaa tccacttgct
7861 cacaatgtgg acgctggtca gagcaggaca atatgagcgc tattgctgcg atcggtgcgg
7921 ctgctggagc agtcaatgct ggatctgggc taataggctc tattgcaaac gctgtgatag
7981 ctggacagaa attagacatc caaaaaggtg ctcttcaagc tcagatagat ctgtacaata
8041 aggagtatag ttataattta ggaaagttta attttgataa ggaaataacc aatcaatatt
8101 tagatttaaa taggaaacaa ttggaaatgg tatcaaaatt gaatgttcag ggccccgcct
8161 tgcaagcgca agccatggca gatcatgggt ttcgtaataa cctttattcc aacggcaggc
8221 agctaacata tgctgaactc aatcaagcta tgtcggctgc agccactagg ttttacaagc
8281 ccactttcca aacggaccag tgaacattgt ag
//
LOCUS Rota-BF-YN-CHN-2020-NSP1 1320 bp RNA linear VRL
07-JAN-2021
DEFINITION Rotavirus J isolate Rota-BF-YN-CHN-2020-NSP1.
ACCESSION Rota-BF-YN-CHN-2020-NSP1
VERSION
KEYWORDS .
SOURCE Rotavirus J
ORGANISM Rotavirus J
Viruses; Riboviria; Orthornavirae; Duplornaviricota;
Resentoviricetes; Reovirales; Reoviridae; Sedoreovirinae;
Rotavirus.
REFERENCE 1 (bases 1 to 1320)
AUTHORS Han,Z., Xiao,J., Song,Y., Lu,H., Zhang,K., Li,J., Si,F., Sun,Q.,
Wang,D., Zhu,S., Yan,D., Xu,W. and Zhang,Y.
TITLE Large-scale screening for SARS-CoV-2 from specimens of several host
species and highly diverse RNA viruses
JOURNAL unpublished
REFERENCE 2 (bases 1 to 1320)
AUTHORS Han,Z., Xiao,J., Song,Y., Lu,H., Zhang,K., Li,J., Si,F., Sun,Q.,
Wang,D., Zhu,S., Yan,D., Xu,W. and Zhang,Y.
TITLE Direct Submission
JOURNAL Submitted (07-JAN-2021) National Institute for Viral Disease
Control and Prevention, Chinese Center for Disease Control and
Prevention, No. 155, Changbai Road, Changping District, Beijing,
Beijing 102206, China
COMMENT Bankit Comment: ALT EMAIL:hansir8@qq.com
Bankit Comment: TOTAL # OF SEQS:20
##Assembly-Data-START##
Assembly Method :: Trinity v. 2.8.4; Sequencher v. 5.0
Assembly Name :: metagenomic assembly
Coverage :: 90
Sequencing Technology :: Illumina
##Assembly-Data-END##
FEATURES Location/Qualifiers
source 1..1320
/organism="Rotavirus J"
/mol_type="genomic RNA"
/isolate="Rota-BF-YN-CHN-2020-NSP1"
/isolation_source="anal and throat swabs"
/host="Rhinolophus sinicus"
/db_xref="taxon:1929964"
/country="China"
/collection_date="20-Feb-2020"
5'UTR 1..43
CDS 44..1246
/codon_start=1
/product="NSP1 protein"
/translation="MLSTLKTKNLGLAFNQKFDYMTVRERWFAMFPTDGPKDVLQLFD
WSYEGKALADVNKTRAAQQGKVMHIKTDVQGRQMDEPAFSGGRMLLHDVCGRMDEHFC
TAIHPIWTNEENYNDVIKSRIQLATESKIFCPCGVKMIITKSRDGNEKNFMVGTKFTR
CACGKLRIVAATVTGPDSIAYLTFCDEDMPVVVVNPGKMDLCRVCQTEISYYEAQCTT
WQNPDFRDFKPKMQLCVNCLPMRSMFSLLMQKGYKPNVTGADYDKAKKAWKNGFIKQP
TQNARAAFVSINYDLWYKNLHALVLNDDPYFISRAKNRMWLRDLTVEGVESNPGPDYI
SLLNMDAQRRQIHFPMYEDEKVLDMNNFAFKVTCFYMQWKTEAVGVSKKQAKHEAAEK
MYKLMNNE"
3'UTR 1247..1320
BASE COUNT 449 a 239 c 309 g 323 t
ORIGIN
1 ttttggtttc tcggctggtt tggaggatct taaggaaagc aggatgttgt ctacactcaa
61 aacaaagaac cttggattgg ctttcaacca aaaatttgat tacatgacag tgagagaaag
121 gtggtttgcg atgtttccaa cggatgggcc aaaggacgta cttcaactct tcgattggag
181 ttatgaagga aaagccctgg cggacgttaa taaaacgaga gcggcgcaac aaggtaaggt
241 catgcatatc aagacagatg tgcagggaag gcagatggat gaacccgcat tctccggcgg
301 aagaatgtta ctgcatgatg tgtgtggaag aatggatgaa cacttttgca cagcaataca
361 tccgatttgg acaaatgaag aaaattacaa tgatgtgata aagtcgagga ttcaattggc
421 aaccgagtca aaaattttct gtccatgtgg agtgaagatg ataattacaa agagcagaga
481 tggaaatgaa aagaatttta tggttgggac aaagtttaca agatgtgcct gtggtaaact
541 gagaatcgtg gcagcaacag ttacaggtcc agattcaatc gcttacttaa cattctgtga
601 tgaagacatg ccggtggttg tagtaaaccc aggaaaaatg gatttgtgta gagtctgcca
661 aacggaaatc tcatactatg aggcgcagtg cacaacatgg caaaacccag acttcagaga
721 tttcaaacca aagatgcaac tatgtgttaa ctgtttgcca atgagatcaa tgttttcact
781 attaatgcaa aagggataca agcctaacgt aacgggcgct gattacgaca aagcaaaaaa
841 agcatggaag aacggcttca tcaaacagcc aacacaaaat gccagagctg ctttcgtttc
901 aattaattat gatctgtggt ataagaatct acacgcccta gttctaaacg acgatccgta
961 tttcatttca agagcgaaaa acaggatgtg gctgcgcgac ttaacagttg aaggtgttga
1021 atcgaaccct gggcctgatt acatttcact tctcaacatg gatgcacaac gtagacagat
1081 acattttcca atgtatgaag atgaaaaagt tctcgacatg aacaactttg ccttcaaggt
1141 gacatgtttc tacatgcaat ggaagactga agcagtcgga gtttcaaaaa agcaagccaa
1201 acatgaagca gcagaaaaga tgtacaaact tatgaataat gagtgaattc gcgtcctggg
1261 accgttgcag cggttctgac ttaagatacc aaattaagta ggaaatcaac aatacaccct
//
LOCUS Rota-BF-YN-CHN-2020-NSP2 1009 bp RNA linear VRL
07-JAN-2021
DEFINITION Rotavirus J isolate Rota-BF-YN-CHN-2020-NSP2.
ACCESSION Rota-BF-YN-CHN-2020-NSP2
VERSION
KEYWORDS .
SOURCE Rotavirus J
ORGANISM Rotavirus J
Viruses; Riboviria; Orthornavirae; Duplornaviricota;
Resentoviricetes; Reovirales; Reoviridae; Sedoreovirinae;
Rotavirus.
REFERENCE 1 (bases 1 to 1009)
AUTHORS Han,Z., Xiao,J., Song,Y., Lu,H., Zhang,K., Li,J., Si,F., Sun,Q.,
Wang,D., Zhu,S., Yan,D., Xu,W. and Zhang,Y.
TITLE Large-scale screening for SARS-CoV-2 from specimens of several host
species and highly diverse RNA viruses
JOURNAL unpublished
REFERENCE 2 (bases 1 to 1009)
AUTHORS Han,Z., Xiao,J., Song,Y., Lu,H., Zhang,K., Li,J., Si,F., Sun,Q.,
Wang,D., Zhu,S., Yan,D., Xu,W. and Zhang,Y.
TITLE Direct Submission
JOURNAL Submitted (07-JAN-2021) National Institute for Viral Disease
Control and Prevention, Chinese Center for Disease Control and
Prevention, No. 155, Changbai Road, Changping District, Beijing,
Beijing 102206, China
COMMENT Bankit Comment: ALT EMAIL:hansir8@qq.com
Bankit Comment: TOTAL # OF SEQS:20
##Assembly-Data-START##
Assembly Method :: Trinity v. 2.8.4; Sequencher v. 5.0
Assembly Name :: metagenomic assembly
Coverage :: 90
Sequencing Technology :: Illumina
##Assembly-Data-END##
FEATURES Location/Qualifiers
source 1..1009
/organism="Rotavirus J"
/mol_type="genomic RNA"
/isolate="Rota-BF-YN-CHN-2020-NSP2"
/isolation_source="anal and throat swabs"
/host="Rhinolophus sinicus"
/db_xref="taxon:1929964"
/country="China"
/collection_date="20-Feb-2020"
5'UTR 1..50
CDS 51..950
/codon_start=1
/product="NSP2 protein"
/translation="MALKASLADFVVKTDDGYIPSDTSCEALDRFNTKEEKALKDAYH
KQGADRAEIRKRMFVTPGCSRRMTQHGLVPVKELRSGSAIPSALKKLITKWLLDMLND
EDNGETAEKYIIDKFPDVLISADKLSRLAQRLEDDSDLIHESVGFQTLAAAACAIPST
VATEGKCEIVRATEDAIIARFDPVPEHLSMARHRGTFFKAFPVNKNEPMVYGVKALSG
LSNRDFIMFHGHGHLRTVPYNEIPDAIRSFSRKQKEEITKIMSDPIANNAGDRFLSMC
NMILQSEKIETIIQKTMKPDKKQ"
3'UTR 951..1009
BASE COUNT 340 a 192 c 232 g 245 t
ORIGIN
1 agagtgttgc agattccata gtccgcgtcc atcgcaggcg ggagagaact atggcgctga
61 aggcgagtct ggctgatttc gttgtgaaaa cagatgatgg ttacattcct tctgatacaa
121 gctgtgaagc acttgacaga tttaatacaa aagaagaaaa ggcactaaag gatgcttacc
181 ataaacaagg agctgataga gctgaaatta ggaagaggat gtttgtcacc ccaggatgca
241 gtagaagaat gacacaacat ggactagtgc cagtgaaaga gttgagatca ggatcagcaa
301 tcccttctgc tctgaaaaaa ctgattacta agtggctcct tgacatgctc aatgatgaag
361 acaatggtga gaccgctgaa aaatatataa ttgacaagtt tccagatgtt ctaatctctg
421 ctgataaatt gtctcgacta gctcagagac tggaagatga ctcagattta attcatgagt
481 cggtagggtt tcaaacgctt gctgcagcgg cgtgcgcgat cccttccact gtcgcaacag
541 agggtaaatg tgagattgtt cgtgcaactg aggatgcgat aatcgcaaga tttgatccag
601 ttccagaaca tttgagcatg gctagacatc gtggaacatt tttcaaagct tttcctgtga
661 acaaaaacga accaatggtg tatggagtta aggcgctatc aggactatcg aatcgtgatt
721 tcataatgtt ccacggtcat ggacatttga gaactgtccc atacaatgag atacctgatg
781 caatcagatc attttcaaga aaacagaaag aggaaatcac caaaataatg tctgatccaa
841 tcgcaaacaa cgctggagat agatttctgt caatgtgcaa catgattcta cagagtgaaa
901 agattgagac tataattcaa aaaacaatga aacccgataa gaagcagtaa gaaatcagtt
961 ggcagcaata ggcgaacaaa gtctgtaaac acctaatgcc aatacaccc
//
LOCUS Rota-BF-YN-CHN-2020-NSP3 1094 bp RNA linear VRL
07-JAN-2021
DEFINITION Rotavirus J isolate Rota-BF-YN-CHN-2020-NSP3.
ACCESSION Rota-BF-YN-CHN-2020-NSP3
VERSION
KEYWORDS .
SOURCE Rotavirus J
ORGANISM Rotavirus J
Viruses; Riboviria; Orthornavirae; Duplornaviricota;
Resentoviricetes; Reovirales; Reoviridae; Sedoreovirinae;
Rotavirus.
REFERENCE 1 (bases 1 to 1094)
AUTHORS Han,Z., Xiao,J., Song,Y., Lu,H., Zhang,K., Li,J., Si,F., Sun,Q.,
Wang,D., Zhu,S., Yan,D., Xu,W. and Zhang,Y.
TITLE Large-scale screening for SARS-CoV-2 from specimens of several host
species and highly diverse RNA viruses
JOURNAL unpublished
REFERENCE 2 (bases 1 to 1094)
AUTHORS Han,Z., Xiao,J., Song,Y., Lu,H., Zhang,K., Li,J., Si,F., Sun,Q.,
Wang,D., Zhu,S., Yan,D., Xu,W. and Zhang,Y.
TITLE Direct Submission
JOURNAL Submitted (07-JAN-2021) National Institute for Viral Disease
Control and Prevention, Chinese Center for Disease Control and
Prevention, No. 155, Changbai Road, Changping District, Beijing,
Beijing 102206, China
COMMENT Bankit Comment: ALT EMAIL:hansir8@qq.com
Bankit Comment: TOTAL # OF SEQS:20
##Assembly-Data-START##
Assembly Method :: Trinity v. 2.8.4; Sequencher v. 5.0
Assembly Name :: metagenomic assembly
Coverage :: 90
Sequencing Technology :: Illumina
##Assembly-Data-END##
FEATURES Location/Qualifiers
source 1..1094
/organism="Rotavirus J"
/mol_type="genomic RNA"
/isolate="Rota-BF-YN-CHN-2020-NSP3"
/isolation_source="anal and throat swabs"
/host="Rhinolophus sinicus"
/db_xref="taxon:1929964"
/country="China"
/collection_date="20-Feb-2020"
5'UTR 1..34
CDS 35..1030
/codon_start=1
/product="NSP3 protein"
/translation="MAELIYDTLRSVVRNLYGDNEDSASFVRTFQLAMKDSGLEENVD
NWRKCFYKKRIPKEMTSSTLSIQIQNLEREIIKIRTEGFCAGYDRKARTLNAFEIGKS
KQGHTILIPSTHLSEIILQNTFNENLKLSPIPSEALERASIENNKLKQEIDELKATIT
NLSKQISEQEDSRLELMATQSVLNHQKKLTKRMQDQRDEAQYIIQGLCNRFGLQCFID
NRGVAFTEPDNKGKRKGRKNRRIPIYDYTFGDFDRPIEEDYVKDLTTEGIEPNPGPTA
ERLFCALFSVIASIVIIERILMYDFDNPDVRFMAPLIIFFTKIYFTFLLIVSIWI"
3'UTR 1031..1094
BASE COUNT 388 a 205 c 214 g 287 t
ORIGIN
1 cttaggacga gcgcttgctc tgaaagaatc caaaatggct gagttgatct acgatacact
61 cagatcggtg gttcgcaatt tgtatggaga caatgaagat tcagctagct ttgtaagaac
121 cttccagcta gcgatgaaag attcaggact tgaggaaaat gtcgataatt ggcgtaaatg
181 cttctataag aaaagaattc caaaggaaat gacctcatca acgctgtcaa tccaaattca
241 gaatcttgaa cgtgaaataa tcaaaatcag gactgaagga ttttgtgctg gatacgacag
301 gaaagccaga actctgaacg cattcgaaat tggtaaaagt aaacagggac acacaatttt
361 gattccatcc actcacttat ccgagatcat acttcaaaac actttcaatg aaaatcttaa
421 actctctccc attccatctg aagctctcga gagagcgagc attgaaaaca ataaattaaa
481 gcaagaaatt gacgagttaa aagcaacaat aacaaaccta agcaaacaaa tttcggagca
541 agaggattcg agattggaac tgatggcgac tcaatcagtg ttaaatcacc agaaaaagtt
601 gactaagaga atgcaggatc agagagatga agctcagtat ataattcaag gactatgtaa
661 tagattcgga ctgcagtgct ttattgacaa ccggggtgtt gcgttcactg aaccagataa
721 caaaggaaag aggaaaggta gaaagaatag acgcatacca atctatgatt acacatttgg
781 tgattttgac agaccgattg aagaagatta cgttaaagat ttaacgactg aaggaattga
841 accaaatcca ggcccgaccg ctgaaaggct cttctgtgcg cttttctcag tgatcgcttc
901 catagtaatc attgaaagaa ttctcatgta tgattttgac aacccagatg ttagattcat
961 ggctccatta attatattct tcacgaaaat ctactttacc tttctattaa ttgtttcaat
1021 ctggatataa ataatatagg tatcatagat caattggctt aattgggtga tctctccacc
1081 catcaaatac accc
//
LOCUS Rota-BF-YN-CHN-2020-NSP4 738 bp RNA linear VRL 07-JAN-2021
DEFINITION Rotavirus J isolate Rota-BF-YN-CHN-2020-NSP4.
ACCESSION Rota-BF-YN-CHN-2020-NSP4
VERSION
KEYWORDS .
SOURCE Rotavirus J
ORGANISM Rotavirus J
Viruses; Riboviria; Orthornavirae; Duplornaviricota;
Resentoviricetes; Reovirales; Reoviridae; Sedoreovirinae;
Rotavirus.
REFERENCE 1 (bases 1 to 738)
AUTHORS Han,Z., Xiao,J., Song,Y., Lu,H., Zhang,K., Li,J., Si,F., Sun,Q.,
Wang,D., Zhu,S., Yan,D., Xu,W. and Zhang,Y.
TITLE Large-scale screening for SARS-CoV-2 from specimens of several host
species and highly diverse RNA viruses
JOURNAL unpublished
REFERENCE 2 (bases 1 to 738)
AUTHORS Han,Z., Xiao,J., Song,Y., Lu,H., Zhang,K., Li,J., Si,F., Sun,Q.,
Wang,D., Zhu,S., Yan,D., Xu,W. and Zhang,Y.
TITLE Direct Submission
JOURNAL Submitted (07-JAN-2021) National Institute for Viral Disease
Control and Prevention, Chinese Center for Disease Control and
Prevention, No. 155, Changbai Road, Changping District, Beijing,
Beijing 102206, China
COMMENT Bankit Comment: ALT EMAIL:hansir8@qq.com
Bankit Comment: TOTAL # OF SEQS:20
##Assembly-Data-START##
Assembly Method :: Trinity v. 2.8.4; Sequencher v. 5.0
Assembly Name :: metagenomic assembly
Coverage :: 90
Sequencing Technology :: Illumina
##Assembly-Data-END##
FEATURES Location/Qualifiers
source 1..738
/organism="Rotavirus J"
/mol_type="genomic RNA"
/isolate="Rota-BF-YN-CHN-2020-NSP4"
/isolation_source="anal and throat swabs"
/host="Rhinolophus sinicus"
/db_xref="taxon:1929964"
/country="China"
/collection_date="20-Feb-2020"
5'UTR 1..20
CDS 21..653
/codon_start=1
/product="NSP4 protein"
/translation="MTVDPAMDNITEQQSPTPDYGNDGIEMHLQNLTINMMQQYFKDM
TFEGILAHMVLLIMSLLGLKVSDLARRKIMYLAQLFYWKLRGEVKTIVEEDIPKNKEQ
EKIMQLEEKILNLENYVNSLAMEKSKTGLSEQEIYERFHNMYDLIKNESTSKLTSLER
KLEDQNWRLAILAERRMQPQTGINVQSMASSGVNKIYTIQEENNNKEDIM"
3'UTR 654..738
BASE COUNT 283 a 123 c 154 g 178 t
ORIGIN
1 ttggtcgcct agagttaaag atgactgtcg atccagcaat ggataacatt acagaacaac
61 agagtccaac tccagattac ggaaatgatg gaattgaaat gcatttacag aatctaacaa
121 taaatatgat gcagcaatat tttaaagata tgacttttga aggaatactt gcacacatgg
181 tgttgctaat aatgtcgttg cttggactaa aagtttcaga tttggcccga aggaaaataa
241 tgtatcttgc gcaattgttt tattggaagc tgcgaggaga agtgaaaacc atcgttgaag
301 aagatatccc aaagaataaa gagcaagaaa aaatcatgca acttgaagaa aaaattctaa
361 atctagaaaa ttacgtgaac agtttagcta tggaaaaatc aaagacaggg ctatcagagc
421 aagaaatata tgaacgattc cacaacatgt atgatttgat taagaacgaa tcaacatcaa
481 agctaacatc tttggaaaga aagcttgagg atcagaattg gagattggcg atattggcag
541 aacgaagaat gcaaccacaa actgggatca acgtacaaag tatggcatca tctggagtaa
601 ataagatcta caccatacaa gaggaaaaca acaataaaga ggacatcatg taactccatg
661 atggcgagta ccctgcggtg cactaggatt aagttcagtt ttgcatcggc tcatccaggg
721 tcacctgtaa tatacccc
//
LOCUS Rota-BF-YN-CHN-2020-NSP5 612 bp RNA linear VRL 07-JAN-2021
DEFINITION Rotavirus J isolate Rota-BF-YN-CHN-2020-NSP5.
ACCESSION Rota-BF-YN-CHN-2020-NSP5
VERSION
KEYWORDS .
SOURCE Rotavirus J
ORGANISM Rotavirus J
Viruses; Riboviria; Orthornavirae; Duplornaviricota;
Resentoviricetes; Reovirales; Reoviridae; Sedoreovirinae;
Rotavirus.
REFERENCE 1 (bases 1 to 612)
AUTHORS Han,Z., Xiao,J., Song,Y., Lu,H., Zhang,K., Li,J., Si,F., Sun,Q.,
Wang,D., Zhu,S., Yan,D., Xu,W. and Zhang,Y.
TITLE Large-scale screening for SARS-CoV-2 from specimens of several host
species and highly diverse RNA viruses
JOURNAL unpublished
REFERENCE 2 (bases 1 to 612)
AUTHORS Han,Z., Xiao,J., Song,Y., Lu,H., Zhang,K., Li,J., Si,F., Sun,Q.,
Wang,D., Zhu,S., Yan,D., Xu,W. and Zhang,Y.
TITLE Direct Submission
JOURNAL Submitted (07-JAN-2021) National Institute for Viral Disease
Control and Prevention, Chinese Center for Disease Control and
Prevention, No. 155, Changbai Road, Changping District, Beijing,
Beijing 102206, China
COMMENT Bankit Comment: ALT EMAIL:hansir8@qq.com
Bankit Comment: TOTAL # OF SEQS:20
##Assembly-Data-START##
Assembly Method :: Trinity v. 2.8.4; Sequencher v. 5.0
Assembly Name :: metagenomic assembly
Coverage :: 90
Sequencing Technology :: Illumina
##Assembly-Data-END##
FEATURES Location/Qualifiers
source 1..612
/organism="Rotavirus J"
/mol_type="genomic RNA"
/isolate="Rota-BF-YN-CHN-2020-NSP5"
/isolation_source="anal and throat swabs"
/host="Rhinolophus sinicus"
/db_xref="taxon:1929964"
/country="China"
/collection_date="20-Feb-2020"
5'UTR 1..51
CDS 52..549
/codon_start=1
/product="NSP5 protein"
/translation="MSEELAFTFKSKKSKKLSPKLILPENDAASTVIVEEDVKSLASE
SESSEHSYEKYAQAYDDFSRELAASESKSVDFAEDFEDVETVEEKRKAPKVLSKIQKP
IVQSGNDGLEYKLAQLQLRLEKVESENKAKTLESAMNMVIANVDNLTTPQKKTLLHAI
ISTMK"
3'UTR 550..612
BASE COUNT 220 a 128 c 130 g 134 t
ORIGIN
1 aaaagatctg agcgcggctg caaacgtgca tcagacgccg actgcctggg aatgagtgaa
61 gagctggcat tcacgtttaa atcaaagaaa tcaaagaaac tctctccaaa attaatcctt
121 ccagaaaacg acgcggcatc tactgttatc gttgaagaag acgttaaatc attggcctca
181 gaatctgaga gttcagaaca tagctatgaa aaatacgcac aagcttatga cgatttttca
241 agagagctcg cagcatcaga gtcaaaatct gtcgattttg cagaagattt cgaggacgtt
301 gagactgttg aggagaaacg caaggcgcca aaggtattat caaagataca aaaaccgatt
361 gtacaaagtg gaaacgatgg gctcgaatat aaacttgcac agctccaact tcgattggaa
421 aaagtagaat cggaaaataa ggccaaaaca ctagaatcag caatgaacat ggtaatcgct
481 aacgtcgata acttaaccac accacagaag aaaacgcttc tccatgcaat aatttcaacc
541 atgaagtgaa gagccagttg aggtttaccc tccttcattt accagggaaa gccactttcg
601 gttggaatac ac
//
LOCUS Rota-BF-YN-CHN-2020-VP1 3531 bp RNA linear VRL 07-JAN-2021
DEFINITION Rotavirus J isolate Rota-BF-YN-CHN-2020-VP1.
ACCESSION Rota-BF-YN-CHN-2020-VP1
VERSION
KEYWORDS .
SOURCE Rotavirus J
ORGANISM Rotavirus J
Viruses; Riboviria; Orthornavirae; Duplornaviricota;
Resentoviricetes; Reovirales; Reoviridae; Sedoreovirinae;
Rotavirus.
REFERENCE 1 (bases 1 to 3531)
AUTHORS Han,Z., Xiao,J., Song,Y., Lu,H., Zhang,K., Li,J., Si,F., Sun,Q.,
Wang,D., Zhu,S., Yan,D., Xu,W. and Zhang,Y.
TITLE Large-scale screening for SARS-CoV-2 from specimens of several host
species and highly diverse RNA viruses
JOURNAL unpublished
REFERENCE 2 (bases 1 to 3531)
AUTHORS Han,Z., Xiao,J., Song,Y., Lu,H., Zhang,K., Li,J., Si,F., Sun,Q.,
Wang,D., Zhu,S., Yan,D., Xu,W. and Zhang,Y.
TITLE Direct Submission
JOURNAL Submitted (07-JAN-2021) National Institute for Viral Disease
Control and Prevention, Chinese Center for Disease Control and
Prevention, No. 155, Changbai Road, Changping District, Beijing,
Beijing 102206, China
COMMENT Bankit Comment: ALT EMAIL:hansir8@qq.com
Bankit Comment: TOTAL # OF SEQS:20
##Assembly-Data-START##
Assembly Method :: Trinity v. 2.8.4; Sequencher v. 5.0
Assembly Name :: metagenomic assembly
Coverage :: 90
Sequencing Technology :: Illumina
##Assembly-Data-END##
FEATURES Location/Qualifiers
source 1..3531
/organism="Rotavirus J"
/mol_type="genomic RNA"
/isolate="Rota-BF-YN-CHN-2020-VP1"
/isolation_source="anal and throat swabs"
/host="Rhinolophus sinicus"
/db_xref="taxon:1929964"
/country="China"
/collection_date="20-Feb-2020"
CDS 1..3507
/codon_start=1
/product="VP1 protein"
/translation="MDAADYLEWLSRSTVRNLAYTSLVYSNPKVAIVKINDENENFES
VEQRQNSPSQIIEEISQIMKSNKTADEKLETLLRMRYFSVYVDDKKDKRELVSQMLKK
TIGEIKTSNECDEMIKDATEKIASQARKWKIENGKSLRPYHHDQPISNFLKTNEFEVL
KNEKDEYRWRSDTLEGTIPHYNHRTHTLISSLVFALQSRIHEYSGCKASAIKYLLVKI
QERYEEGYLELLPNRKWSLSYSEIFNSKIRLYSAKVIHAASAMITLAHADPIDHVFLC
QIISAFEIIPANAAKLLSSPMTLYIGIAQLKSNEVVSTSSAAEVSPTLNPNVQKLSDD
QINEWNQEMDEYPLHESIMVKHMKRNIYNVNIESFYLIFNCFSATFHVGHRIDNQQDA
IEDQVSVNYTSDVDREMYDQYYHMMKRMFRDEIAFYVDEMARKFNSDVTAESLSALAN
SSNGFSKTVTFIDRQIKTTKKLLHLDDDLINNSEGLQNIGAILQNGIPMGTRNVPARQ
TRGIFILPWQVAAVQHTLAETMYKRAKKGAQNASFAEAYTAKAATLTYGLLAQATSRA
DQLILYTDVSQWDASQHNTEPYRSAWINAIDEAREIYHVNKSEEPTVLGMNVLDKMKE
IQAALLNSKLLIESPGSQRPPKVITYHGVASGEKTTKIGNSYANVALINTILRKVELD
LPSIRVTHIRVDGDDNVVTMYVNDNIAKVQSIIKEAYKRMNARVKALASYTGLEMAKR
FIISGKIFERGAISIFTAERPYGTDLSAQATTGSLLYSASVNAYRGFGDKYLSFLEDV
LVPPSASIRVTGRLRMLLSPVTLFATGPVSFEVTPFGLGGRMRLYSDNEKIMQLFKIL
TTSLSISVQPDEVKLYSQTKQFDVRVNKIQDSIRRAMNADAKIIIDVARDKEKQKTLG
VPNVATTKNRSQIEKARKTLSFKEEKLSKVKDFYPEELFIEFIKNSKVEEFKSVEFTP
IYMHNSERIRLLQQQLGVRISDRHLFSKPKNTLLDLVSKHSPIKISPDDLVKYSKKYN
LTTLEGKKKFLIDLGLTGSELRYYLSSKLLMHDLLISKYDKLYETPGFGATQLTSIPL
DLSAAEVIFKCNIPMPHNYYEILMLILLYEYVHYVLFTGKRFTAVITVDSPKNAAKLT
SKLMKMIDNLQLDVVSFSDVVY"
3'UTR 3508..3531
BASE COUNT 1243 a 685 c 714 g 889 t
ORIGIN
1 atggatgctg cggactatct cgaatggctt tcgagaagta cggttcgcaa tttagcatac
61 acatcccttg tttattcaaa tccaaaggtc gctatagtta aaatcaatga tgaaaatgaa
121 aatttcgaat cagttgaaca aaggcagaat tctccatccc agatcattga agagatttcg
181 caaataatga agagcaacaa aaccgctgat gaaaagctgg aaacactgtt gagaatgaga
241 tatttttcag tttacgtaga tgataagaaa gataagagag agctggtttc tcaaatgctg
301 aagaaaacga tcggcgaaat caaaacatcc aatgaatgcg acgaaatgat taaagatgca
361 acagaaaaga tagcaagcca ggctaggaag tggaaaatcg aaaatggaaa atccctcaga
421 ccatatcacc atgatcaacc aatttcaaac tttctaaaaa cgaatgaatt cgaagttttg
481 aaaaatgaaa aggatgagta ccgatggaga tcagatacac ttgaaggaac gataccgcac
541 tacaatcaca gaacgcatac gctcatatca tcgttagttt ttgcgcttca aagccgaatc
601 cacgaatata gcgggtgtaa agcatcagca attaaatatt tgttagttaa aattcaggaa
661 agatacgaag agggttatct tgagctgcta ccaaatagga aatggtctct aagctattca
721 gaaatcttca attcgaaaat aagactttat tcagcaaaag tcatccacgc agcgtctgca
781 atgataacat tagcacacgc agatccgata gatcacgttt tcttatgcca aattatctca
841 gcgtttgaaa taatacccgc aaatgcagcg aaattgttat cgtcgccaat gacgttgtac
901 ataggcatag cacaactcaa atcaaacgaa gttgtttcca catcatcagc ggctgaagta
961 tcgccgacgc tgaatcccaa cgttcagaaa ctttctgatg atcagattaa cgaatggaat
1021 caggagatgg atgaatatcc actccatgaa tctataatgg taaaacatat gaagaggaac
1081 atttataatg tgaacattga atctttctat ctcattttta actgcttttc agcgacgttt
1141 catgtgggtc atagaattga caaccagcaa gacgcaattg aggatcaggt aagtgtaaac
1201 tatacatcgg atgtcgatcg agagatgtat gaccaatact atcacatgat gaaaagaatg
1261 ttcagagatg agatagcatt ttatgtcgat gagatggcaa gaaagttcaa ttccgatgta
1321 accgctgaat cattgtcagc actagcaaat tcatcaaacg gattttcaaa aaccgttaca
1381 ttcatagaca gacaaataaa aacgacgaag aaattgctgc acctcgatga tgacctaatt
1441 aacaacagcg aaggattaca aaacattggc gcaatactgc agaacgggat tccgatgggc
1501 acaaggaatg tgccagcgag gcaaacaaga ggaattttta tattaccgtg gcaagtggct
1561 gcagtacaac acacactagc agagacaatg tacaagagag ctaagaaagg cgcacagaac
1621 gcgtcattcg ccgaagctta cacagcaaag gcggcaactc tgacatatgg tctcctagca
1681 caggccactt caagagcgga tcagctgata ctttatactg acgtttcaca atgggacgcc
1741 tcccaacata atactgaacc atataggtca gcgtggatca atgcaattga cgaagcaaga
1801 gaaatttatc atgttaacaa gtcggaggaa cccactgttc tgggtatgaa cgtgctcgac
1861 aaaatgaaag aaatccaggc cgcgctgctc aattcaaagt tgttaatcga atcaccggga
1921 tcccaaagac caccaaaggt aataacctat cacggagtcg cgtcaggcga aaaaaccacg
1981 aaaattggaa attcatatgc gaatgtcgct ttaatcaaca cgatattgcg caaagtagaa
2041 ctggatctac cgtctataag agttacacac ataagagttg acggcgatga caacgtagta
2101 accatgtacg tcaatgacaa catagcgaag gtgcaatcaa taatcaaaga agcatataaa
2161 cggatgaatg ccagagtaaa ggccttagca tcatatacgg ggctggaaat ggcgaagcgg
2221 tttatcatat cgggcaaaat attcgagaga ggtgcaattt caatatttac cgctgaaaga
2281 ccatatggca ctgatttatc ggcgcaggcg acgacaggat cacttttata ttctgcttca
2341 gttaacgcat atagaggctt cggtgataag tacctgtctt ttctcgaaga cgttctagtt
2401 ccaccatctg cctcgattag ggtaacaggt agactacgaa tgttgctatc gccggttaca
2461 ttgttcgcaa cgggacctgt gtccttcgaa gttacaccgt tcggacttgg gggaagaatg
2521 agattgtact cagacaatga gaaaatcatg cagcttttta agatattaac cacatctctg
2581 tcaatctcag ttcaaccaga tgaagtaaaa ttatactccc aaaccaagca gttcgatgtt
2641 agagtcaata aaattcaaga ttcaatcaga agagcgatga atgctgatgc gaagataata
2701 attgacgtcg ctcgtgacaa agagaagcag aaaacactag gagtcccaaa tgttgcaacg
2761 acaaagaata gatcacaaat cgagaaagcg cgaaagactt tatcatttaa ggaggagaaa
2821 ctgagcaagg ttaaagactt ttaccccgaa gaactattta ttgaatttat caagaattcg
2881 aaggttgaag agtttaagag tgttgaattc acaccaatct acatgcacaa ttcagaaagg
2941 attcgcctct tacagcaaca gcttggcgtg cgaatatccg atagacattt gttttcaaag
3001 cctaaaaata ctttgttaga tctagtttcc aaacattcgc caatcaaaat atcacccgat
3061 gacctagtca aatattctaa aaaatataac ttaacaacat tagagggcaa aaagaaattc
3121 ctgattgatt tagggttgac tggttcagaa ctaaggtatt atttatcatc aaagttattg
3181 atgcacgatc tattgatatc caaatatgat aaactttatg agacgccagg atttggtgcg
3241 acacaactca cgtcgatacc gcttgattta tcagctgctg aagtaatttt taagtgcaat
3301 attcccatgc ctcataatta ttacgaaata ttgatgctaa ttttgctgta tgaatacgtt
3361 cactatgttc tatttacagg aaaacgtttt acagcagtga taacggtgga ttcaccaaaa
3421 aatgcagcga aactgacctc gaaactaatg aaaatgattg acaatctgca gttagacgtc
3481 gtttcttttt cggatgttgt atactaaatt tccctaacaa tatacccccc g
//
LOCUS Rota-BF-YN-CHN-2020-VP2 3010 bp RNA linear VRL 07-JAN-2021
DEFINITION Rotavirus J isolate Rota-BF-YN-CHN-2020-VP2.
ACCESSION Rota-BF-YN-CHN-2020-VP2
VERSION
KEYWORDS .
SOURCE Rotavirus J
ORGANISM Rotavirus J
Viruses; Riboviria; Orthornavirae; Duplornaviricota;
Resentoviricetes; Reovirales; Reoviridae; Sedoreovirinae;
Rotavirus.
REFERENCE 1 (bases 1 to 3010)
AUTHORS Han,Z., Xiao,J., Song,Y., Lu,H., Zhang,K., Li,J., Si,F., Sun,Q.,
Wang,D., Zhu,S., Yan,D., Xu,W. and Zhang,Y.
TITLE Large-scale screening for SARS-CoV-2 from specimens of several host
species and highly diverse RNA viruses
JOURNAL unpublished
REFERENCE 2 (bases 1 to 3010)
AUTHORS Han,Z., Xiao,J., Song,Y., Lu,H., Zhang,K., Li,J., Si,F., Sun,Q.,
Wang,D., Zhu,S., Yan,D., Xu,W. and Zhang,Y.
TITLE Direct Submission
JOURNAL Submitted (07-JAN-2021) National Institute for Viral Disease
Control and Prevention, Chinese Center for Disease Control and
Prevention, No. 155, Changbai Road, Changping District, Beijing,
Beijing 102206, China
COMMENT Bankit Comment: ALT EMAIL:hansir8@qq.com
Bankit Comment: TOTAL # OF SEQS:20
##Assembly-Data-START##
Assembly Method :: Trinity v. 2.8.4; Sequencher v. 5.0
Assembly Name :: metagenomic assembly
Coverage :: 90
Sequencing Technology :: Illumina
##Assembly-Data-END##
FEATURES Location/Qualifiers
source 1..3010
/organism="Rotavirus J"
/mol_type="genomic RNA"
/isolate="Rota-BF-YN-CHN-2020-VP2"
/isolation_source="anal and throat swabs"
/host="Rhinolophus sinicus"
/db_xref="taxon:1929964"
/country="China"
/collection_date="20-Feb-2020"
5'UTR 1..19
CDS 20..2980
/codon_start=1
/product="VP2 protein"
/translation="MESITLFTAKLDEVKPLKEKADIQQLYDEIVQKWDEIEITDLNE
DDYKELLRLIKSLESVFKVKGVNVNTLRNETQQKQKQWDEKIKKENESVKEEQNADND
RNEEETQNSNSDNTPDLMDKILKYSAQGNTNPFTNDVLQIRSILSKTLFVDTDNESYS
VYVPEASTYKVSPIEITFKTIDTFDPKTKITRKQTIILSNNNQVADALGPADVLYTSS
FFDDMTSTSIKELDLYFLDKALGLKKELPNLNYISKLDKEVNPMNVANTVTTSFNQKE
YYDMVMDRQDRSLDARRQAIEFDNVVVDAQRRTVRFPVRLHPFDNQLIDIAANYAVET
QDLANAMREYAMLGADGYVITPKVRVDRDQRLIYNRRSQVLNRLCELSGLVYRTRILH
SMRLMTPLWRTNVFQTSLEDEITRIYSAAEVSMVAIDATVSALSSINIGVAKQTLDAL
LNMSFFRCELELVGSQSSFGAALSAAIALLVLPTDQDHMDEEVFDILCNLVYNELIAW
PSDLPSFVRRNGATNAFRQYVNAGVNREIAAYMRHVLLRRPWLPLVQSNDIRRQCHVL
VPNIDLANVNDPTYVALNGLLNGIINASRRNPNPGRSINANSFRKLLKNLRDICVNKL
MPAVRLLRYNVERVARIFQFLPYSADLFDANPNMRDERLRIKFPISGVLSLLMGITKA
PDAFDWAALLNFADDIRKLDYAEAEATEDAATIAVLKNDINRSVSRKDVWNAEVKPPS
PTIASVAKIPSASLSAILSDRQLINLVRNTHSFRMITEIVNALRAAFENSPTSQHGIG
KGALLNPVPAPFGRSSQYVRRDNVIFQRPPNVQMFTIQQLMQGQHFAGLVAQIRARRP
IFIQGPVQLRVANARDVEQVTMAYLTMNSPYDAFINPIDLRQQRMIEPREVDLFIDDE
LNRTEDDFDNVMAQTSVYVLDAQRLLVPIQAQLRNFDYHDIMITDSVTKHLTMTVAQP
PDLQLFNGLLVFEQ"
3'UTR 2981..3010
BASE COUNT 980 a 629 c 632 g 769 t
ORIGIN
1 gcacaattgt tgctctgcga tggagtcgat tactctcttc accgcaaagc tcgatgaagt
61 caaaccactc aaagagaaag cagatataca gcaactctat gatgagatag tacaaaagtg
121 ggatgaaatt gaaatcaccg atctcaatga agatgattac aaagaattgc ttcggttgat
181 caaatcattg gagtcagtct tcaaagttaa aggtgtaaat gttaacactc tgagaaatga
241 gactcaacag aaacagaagc agtgggatga gaaaattaag aaagaaaatg aaagtgtgaa
301 agaagaacag aacgccgaca atgatcgcaa tgaagaagag acgcagaatt caaactcaga
361 taacacacct gatctaatgg ataaaatcct taaatattcc gctcaaggca acaccaaccc
421 attcacaaat gatgttcttc aaatacgctc aatactatca aaaacactct tcgttgacac
481 ggacaatgaa tcgtattcgg tgtacgttcc cgaagcttca acctacaagg tttcaccgat
541 tgagataact ttcaagacca ttgacacatt cgatccaaaa actaaaataa ctaggaaaca
601 aacaataata ttgtcaaaca ataatcaggt ggctgatgcg cttgggccag ctgatgtttt
661 atatacatct tcattcttcg acgatatgac atcaacctca atcaaagaac tagatctata
721 tttccttgat aaagcgctgg gattgaagaa agaactacca aatctaaatt atatttcaaa
781 gctggacaag gaagtcaatc caatgaatgt agcgaacacg gtgacaacat ccttcaatca
841 aaaagaatac tatgacatgg ttatggatag gcaagacaga tcgctcgatg cacgcaggca
901 agcgattgaa ttcgacaacg ttgttgttga cgcgcaaaga agaactgtaa gattcccagt
961 tcgtttgcat ccatttgaca atcagttgat tgatatagct gcaaactatg ctgttgaaac
1021 gcaagatctc gcaaatgcaa tgagggagta cgcaatgtta ggggcagatg ggtatgtgat
1081 tacgcctaaa gttagagttg atagggatca aagattaata tataacagaa ggtctcaggt
1141 attaaacagg ttgtgcgaac tgtcagggct ggtgtacaga acgagaattc tacactcaat
1201 gagattaatg acccctcttt ggaggacgaa tgttttccaa acttcattgg aagatgagat
1261 cacaagaata tattccgcag ccgaagtctc gatggtcgca atagatgcca cggtgtctgc
1321 attgtcatct attaatatag gcgtggctaa gcaaactctg gacgcccttt tgaatatgtc
1381 attctttaga tgcgaattgg aactggtggg atcacaatca tcattcggtg cggcattgtc
1441 tgccgcaata gcgctactag ttctgccaac agaccaagat catatggatg aggaggtttt
1501 tgacatcttg tgcaatttgg tttataacga attaatcgcc tggccatctg atctgccatc
1561 attcgtgaga agaaacggcg ccaccaacgc tttcagacaa tacgtgaatg ccggagtcaa
1621 cagagaaatc gctgcataca tgcgccatgt tctacttcgt aggccatggc tgcctcttgt
1681 tcagtcaaac gacattagaa ggcaatgtca cgttttagtc ccaaatatcg atctagctaa
1741 cgtgaacgac ccaacatacg tcgcactgaa tgggctgctt aatgggatta taaacgcgtc
1801 ccgtagaaat ccaaatcccg gcagatcaat taacgcgaac tcttttagga aattattgaa
1861 gaatttgaga gatatatgtg ttaataaact catgccggca gttcgactac tgagatataa
1921 cgttgaacga gtagcgagaa ttttccaatt tctgccatat tcagcagatc ttttcgatgc
1981 aaatccgaac atgcgtgacg agcgcttaag aatcaagttt ccgatctccg gcgtcctgtc
2041 attactgatg ggcattacaa aagcgcctga tgcattcgac tgggctgcac ttttaaattt
2101 cgctgatgat attaggaagt tggactatgc agaagcggaa gcaacagagg acgctgcgac
2161 aatcgctgtt ttgaaaaatg atataaatag gtcagtttca aggaaagacg tttggaatgc
2221 agaggttaaa ccgccgtcac caacaatcgc gtcagttgcc aaaatcccat ctgcctcgct
2281 ttccgcgatt ttatcagata gacaattaat caatctcgtt agaaatactc attctttcag
2341 aatgattacc gaaatcgtta acgccttaag agccgcattt gaaaactccc caacttcaca
2401 gcatggaata ggtaaaggcg cgctgttgaa tccagttccg gccccgtttg gcagatcatc
2461 tcaatatgtt agaagggaca atgttatttt tcagagacca ccaaacgttc aaatgttcac
2521 tattcagcag ctcatgcagg gccaacactt cgctggactg gttgcacaaa ttcgcgccag
2581 aagacctatt tttatacagg gtccagtcca gctaagagtc gcgaacgcga gggatgtgga
2641 acaggttaca atggcgtatt tgactatgaa ctcgccatac gacgccttca tcaatccaat
2701 cgacttaaga caacaaagaa tgattgaacc aagagaggta gacctattca ttgacgatga
2761 acttaatcga actgaagatg actttgacaa tgtgatggcg caaacctcag tatacgtcct
2821 cgacgctcaa agattgcttg tccctattca agctcaactg agaaattttg attaccatga
2881 tataatgatt acagattcgg tgaccaagca tctcactatg acagttgcgc aaccgccaga
2941 tctacaatta tttaacgggc ttttggtttt tgagcagtaa tcgagcaaca aacacagaaa
3001 aatacaccct
//
LOCUS Rota-BF-YN-CHN-2020-VP3 2193 bp RNA linear VRL 07-JAN-2021
DEFINITION Rotavirus J isolate Rota-BF-YN-CHN-2020-VP3.
ACCESSION Rota-BF-YN-CHN-2020-VP3
VERSION
KEYWORDS .
SOURCE Rotavirus J
ORGANISM Rotavirus J
Viruses; Riboviria; Orthornavirae; Duplornaviricota;
Resentoviricetes; Reovirales; Reoviridae; Sedoreovirinae;
Rotavirus.
REFERENCE 1 (bases 1 to 2193)
AUTHORS Han,Z., Xiao,J., Song,Y., Lu,H., Zhang,K., Li,J., Si,F., Sun,Q.,
Wang,D., Zhu,S., Yan,D., Xu,W. and Zhang,Y.
TITLE Large-scale screening for SARS-CoV-2 from specimens of several host
species and highly diverse RNA viruses
JOURNAL unpublished
REFERENCE 2 (bases 1 to 2193)
AUTHORS Han,Z., Xiao,J., Song,Y., Lu,H., Zhang,K., Li,J., Si,F., Sun,Q.,
Wang,D., Zhu,S., Yan,D., Xu,W. and Zhang,Y.
TITLE Direct Submission
JOURNAL Submitted (07-JAN-2021) National Institute for Viral Disease
Control and Prevention, Chinese Center for Disease Control and
Prevention, No. 155, Changbai Road, Changping District, Beijing,
Beijing 102206, China
COMMENT Bankit Comment: ALT EMAIL:hansir8@qq.com
Bankit Comment: TOTAL # OF SEQS:20
##Assembly-Data-START##
Assembly Method :: Trinity v. 2.8.4; Sequencher v. 5.0
Assembly Name :: metagenomic assembly
Coverage :: 90
Sequencing Technology :: Illumina
##Assembly-Data-END##
FEATURES Location/Qualifiers
source 1..2193
/organism="Rotavirus J"
/mol_type="genomic RNA"
/isolate="Rota-BF-YN-CHN-2020-VP3"
/isolation_source="anal and throat swabs"
/host="Rhinolophus sinicus"
/db_xref="taxon:1929964"
/country="China"
/collection_date="20-Feb-2020"
5'UTR 1..2
CDS 3..2147
/codon_start=1
/product="VP3 protein"
/translation="MAKVIVRTRNEGYKIESHEDIFKISNKLETEIIVNCTDYIFEKI
KQQTFYVTIDKTSAKGNDAYERYSQIFPTPIFSDNEENYLFGTCRHIISNTLHYTNEL
FIPYESVINDLLPAGWKAEYINSDDYPIGNDVIPNYFDNISNISVAKFLQFSDRFDNK
LPEMRVDHRLKESILNDCLAYVYAPAIDYDVQSYNYRITRREIGNKVRDLVFNMCKGK
MHLIGPELESVRNVVQYLNMKGNTIKFYTLNTTKKLDYDSEKRSLQKKRLKFSNLLAP
QRKNQNNFVKGLIHHLNKSSATVDRVYYIGAYPSYWLENMKWINFQIVCYDPKFRLVD
NPNVLWRDKLFSEEDVENVESGSYVYIDIRSDIRTQSDAVKNKIFKDEDDMILELTRK
LVKKGCTVMAKRKIVEQSIVSIGEECYPPGENQIGREFYNLADASSVEKLLTRKEVFA
KIVNARSNNKQNYVYGGTKFDSSTIIEDNEIVIGLYSLSNSFNSLATIEHVIKSNHVI
TFPTDREHGDWRDISKAQSKPFVGKIKQLNFEDWAVNPKAYCKKYNVEMLAEQVFLQY
GNTRAFIPDLYCHMVSTNMAEKLKYSDRFFAHIGIRQPSIYARDKYMTSRISAYISRK
LTHGIDLRDLERDNFAGYSGHLIAIETSFNSLVYTMSPLRWIQRAQRRETRKDKFQIG
KGEPHTEEEYKNTYDYLDDHNKQIIDFRTELL"
3'UTR 2148..2193
BASE COUNT 789 a 397 c 433 g 574 t
ORIGIN
1 acatggcgaa ggtgatcgtt cgaaccagaa atgaaggata caagatcgaa agtcacgaag
61 atatatttaa aatctcaaac aaacttgaaa ccgagataat cgtgaattgt actgattata
121 tatttgagaa aattaaacaa caaacattct acgttacaat tgacaaaacg tcagcgaaag
181 gaaatgatgc ttatgaaaga tattctcaaa ttttccctac tccaattttt tctgataacg
241 aagaaaatta tctctttggc acttgtagac acattatttc taatactctc cattatacta
301 atgagctgtt tatcccttat gaaagcgtta tcaatgattt actacctgct ggatggaaag
361 cagagtatat taatagtgat gactatccta tcggcaatga cgttatacca aactattttg
421 acaacatcag taacatcagc gtcgctaaat ttcttcaatt ttctgacagg tttgataaca
481 agcttcctga aatgagagtg gaccatcgtc ttaaagaatc aattctcaat gattgtctag
541 cgtacgtcta cgcacccgca attgattatg atgtgcaatc ttacaactat agaataacaa
601 gaagagagat aggcaataaa gttcgcgatt tagtcttcaa catgtgtaaa ggtaaaatgc
661 atttaattgg tccagaacta gaatcggtaa gaaatgtagt gcagtatctg aatatgaaag
721 gcaacacaat taaattttac acattaaaca ccacgaagaa gcttgattat gactcagaga
781 agcgcagtct tcaaaagaag agattaaagt tctcaaattt gctggccccc cagagaaaga
841 atcaaaataa cttcgttaag ggactgattc atcatttaaa taaaagttca gcgactgttg
901 acagagttta ttacataggt gcatacccat cctattggtt agaaaacatg aagtggatta
961 actttcagat agtatgctac gacccaaagt tcagactggt cgacaatcca aacgtgcttt
1021 ggagagataa attattttct gaagaagacg ttgagaacgt tgaaagtgga tcatacgtgt
1081 acattgacat tcgctctgac atacggacac agtctgatgc tgtgaaaaat aaaatcttta
1141 aagatgaaga cgatatgata ttagaactga cgagaaaact cgtgaagaaa gggtgcacgg
1201 taatggcaaa acgaaagata gttgaacaga gcatagtatc gatcggagag gaatgctatc
1261 caccaggaga aaaccagatt ggaagggagt tttacaatct cgcagacgca tccagtgtag
1321 aaaagttatt gacgcggaag gaggttttcg ccaaaatagt caatgcaaga tcgaacaata
1381 aacaaaacta tgtctatggt ggaacaaaat ttgattcatc tacgattatt gaagacaatg
1441 aaatcgtaat tggcttgtac tcgttatcaa actcattcaa ctcgctagca acaatagaac
1501 atgtaatcaa atcaaaccac gtaataactt tccccaccga cagagagcac ggtgattggc
1561 gcgacatttc aaaggcgcag agtaagccat tcgttgggaa aataaaacaa cttaacttcg
1621 aagattgggc agttaatcca aaagcgtact gtaagaaata taacgttgaa atgcttgcag
1681 aacaggtgtt cctgcagtat ggcaataccc gcgcttttat accggatctc tattgtcata
1741 tggtatccac aaacatggcg gaaaaactga aatattctga tagatttttc gcgcacattg
1801 gaataagaca accatctata tacgcgagag ataaatatat gacatcaagg atatcagcat
1861 acatttcgcg gaaattaaca cacggcatag acttgcgtga cttagagaga gataatttcg
1921 ctgggtactc tggacatctg attgcaatag aaacaagttt taattcttta gtctacacca
1981 tgtctccgct tagatggata cagcgtgcgc aacgaagaga aacgcggaag gacaaatttc
2041 agatagggaa aggtgagcca cacactgaag aagaatataa aaacacatac gactatctcg
2101 atgatcacaa taaacagata attgattttc ggactgaact gctttgaacc catctttgcc
2161 atggactccg gaatggagga gcaatacacc ccg
//
LOCUS Rota-BF-YN-CHN-2020-VP6 1273 bp RNA linear VRL 07-JAN-2021
DEFINITION Rotavirus J isolate Rota-BF-YN-CHN-2020-VP6.
ACCESSION Rota-BF-YN-CHN-2020-VP6
VERSION
KEYWORDS .
SOURCE Rotavirus J
ORGANISM Rotavirus J
Viruses; Riboviria; Orthornavirae; Duplornaviricota;
Resentoviricetes; Reovirales; Reoviridae; Sedoreovirinae;
Rotavirus.
REFERENCE 1 (bases 1 to 1273)
AUTHORS Han,Z., Xiao,J., Song,Y., Lu,H., Zhang,K., Li,J., Si,F., Sun,Q.,
Wang,D., Zhu,S., Yan,D., Xu,W. and Zhang,Y.
TITLE Large-scale screening for SARS-CoV-2 from specimens of several host
species and highly diverse RNA viruses
JOURNAL unpublished
REFERENCE 2 (bases 1 to 1273)
AUTHORS Han,Z., Xiao,J., Song,Y., Lu,H., Zhang,K., Li,J., Si,F., Sun,Q.,
Wang,D., Zhu,S., Yan,D., Xu,W. and Zhang,Y.
TITLE Direct Submission
JOURNAL Submitted (07-JAN-2021) National Institute for Viral Disease
Control and Prevention, Chinese Center for Disease Control and
Prevention, No. 155, Changbai Road, Changping District, Beijing,
Beijing 102206, China
COMMENT Bankit Comment: ALT EMAIL:hansir8@qq.com
Bankit Comment: TOTAL # OF SEQS:20
##Assembly-Data-START##
Assembly Method :: Trinity v. 2.8.4; Sequencher v. 5.0
Assembly Name :: metagenomic assembly
Coverage :: 90
Sequencing Technology :: Illumina
##Assembly-Data-END##
FEATURES Location/Qualifiers
source 1..1273
/organism="Rotavirus J"
/mol_type="genomic RNA"
/isolate="Rota-BF-YN-CHN-2020-VP6"
/isolation_source="anal and throat swabs"
/host="Rhinolophus sinicus"
/db_xref="taxon:1929964"
/country="China"
/collection_date="20-Feb-2020"
5'UTR 1..27
CDS 28..1215
/codon_start=1
/product="VP6 protein"
/translation="MDLIETVNAVVSLQKRILKLSPTTQIDQNGQTTVNDYNNIASRT
NGTTHQLLDPIAQRSPYEIRAPIIPLTVVLSTDDFEAMSSGIESILEALAAAIRSEGS
RRNRAIVQKAQDPEVARLITTIGTRSQYSENQFANLQVIDTARMEQTLLPSSAVFRDQ
RIRVLNVNGVAGNTGGGYISAIGRVSGRRLTCTTMLGRPGNVVFDVRFRAPTAGTSSV
TFLPAPGFIQLPRTLLAAGGIPTVAQCCDVSDDMNPDDLRIEYLLGNQIVHATRGTTT
NSFPQCDGLRITVTPWDNNKNQNNNAAFNNWQNNGAQMQPTVSFMLTVEDSVSLVDYD
IYSSESAPASFLMGSIFNRDSFLATPQVDWSFNALLAHTANGESHWARKIATMIAAYS
VKV"
3'UTR 1216..1273
BASE COUNT 372 a 305 c 267 g 329 t
ORIGIN
1 aatagctgct caacctagcg tgatagcatg gatctcatcg agacagtgaa cgctgtggtc
61 agtctacaga aaaggattct caaattatct ccaaccacac agatcgatca gaatggccag
121 acaacagtca atgattacaa caacattgct tcccgtacaa atggaacgac tcatcagtta
181 ctcgatccca ttgctcagcg atctccttat gaaatacgag ctccgattat tccacttaca
241 gtcgtgttat caactgatga ctttgaagct atgtcaagtg gaatcgaatc aattcttgaa
301 gcactcgcag ccgcaatcag aagtgaagga tcaaggagaa acagagcgat tgtccaaaag
361 gcgcaagatc cagaagtcgc gaggctcatc acaacaatcg gaaccagatc acaatattca
421 gagaatcaat ttgccaatct tcaggttatt gatacagcta gaatggaaca aacactccta
481 ccatcctcag cggtgtttcg cgatcagaga attagagtgc ttaatgtcaa tggtgtcgct
541 ggcaacactg gtggtggtta catctcagcc attggaagag tttcaggcag aagactcacc
601 tgtacaacaa tgcttgggcg tccaggaaat gtcgtttttg acgttcggtt tagagctcca
661 acggctggga catcctcagt caccttttta ccagctccag gtttcattca acttccacga
721 acacttcttg cggctggcgg cattccgact gttgctcaat gctgtgacgt ttctgatgat
781 atgaaccctg atgacctaag aattgagtat ttgctaggta atcaaatcgt tcacgcaaca
841 agaggaacaa caacaaactc tttcccacaa tgcgatggtc taaggatcac cgtcactcct
901 tgggacaaca acaaaaatca gaacaataat gcggctttta acaactggca aaataatggc
961 gctcaaatgc aaccgacagt gtcttttatg ttaacggtag aagattcagt gtcacttgtt
1021 gattatgaca tctattcatc agagtcagct ccagcatcat tcctaatggg atcaatcttc
1081 aatcgtgatt cgttccttgc aactccacag gtcgactggt ctttcaacgc tctgctagca
1141 cacactgcga acggcgaatc tcattgggct cgaaaaatag ccacaatgat cgctgcgtat
1201 tctgtcaagg tgtgatctgc tagggcaggc ccattgcctg ttgtgttaga gtagtctatt
1261 tacaatatac ccc
//
LOCUS Ifla-YN-CHN-2020 9924 bp RNA linear VRL 07-JAN-2021
DEFINITION Unclassified Iflavirus isolate Ifla-YN-CHN-2020.
ACCESSION Ifla-YN-CHN-2020
VERSION
KEYWORDS .
SOURCE unclassified Iflavirus
ORGANISM unclassified Iflavirus
Viruses; Riboviria; Orthornavirae; Pisuviricota; Pisoniviricetes;
Picornavirales; Iflaviridae; Iflavirus.
REFERENCE 1 (bases 1 to 9924)
AUTHORS Han,Z., Xiao,J., Song,Y., Lu,H., Zhang,K., Li,J., Si,F., Sun,Q.,
Wang,D., Zhu,S., Yan,D., Xu,W. and Zhang,Y.
TITLE Large-scale screening for SARS-CoV-2 from specimens of several host
species and highly diverse RNA viruses
JOURNAL unpublished
REFERENCE 2 (bases 1 to 9924)
AUTHORS Han,Z., Xiao,J., Song,Y., Lu,H., Zhang,K., Li,J., Si,F., Sun,Q.,
Wang,D., Zhu,S., Yan,D., Xu,W. and Zhang,Y.
TITLE Direct Submission
JOURNAL Submitted (07-JAN-2021) National Institute for Viral Disease
Control and Prevention, Chinese Center for Disease Control and
Prevention, No. 155, Changbai Road, Changping District, Beijing,
Beijing 102206, China
COMMENT Bankit Comment: ALT EMAIL:hansir8@qq.com
Bankit Comment: TOTAL # OF SEQS:20
##Assembly-Data-START##
Assembly Method :: Trinity v. 2.8.4; Sequencher v. 5.0
Assembly Name :: metagenomic assembly
Coverage :: 90
Sequencing Technology :: Illumina
##Assembly-Data-END##
FEATURES Location/Qualifiers
source 1..9924
/organism="unclassified Iflavirus"
/mol_type="genomic RNA"
/isolate="Ifla-YN-CHN-2020"
/isolation_source="anal and throat swabs"
/host="Rhinolophus sinicus"
/db_xref="taxon:336476"
/country="China"
/collection_date="21-Feb-2020"
5'UTR 1..673
CDS 674..9790
/codon_start=1
/product="polyprotein"
/translation="MNKSIKNKTTANPSTSSLSQRPMLIPTNIEDALCDIIVGDYMRD
MAKMEEKYRAKYDLRHRCGLDSAIDDLRLSEEMDLAYKKIIKDRNYLWYLVKSGQYEL
AEKILDTNFLEDYLQSLKIEYVKRQEQSRVAKIKRSKSDPVLFSKCTFLYDNDDYNLT
ATENEDELIKEDVRSFIRDTRRSRKERYSLATLGAGKDAIYVIYDNNKKDRHTWFDCS
DVSSVSERVIKDDENSRSLADWNKLAYAGLRLRACIEKFEELREKLYVKMFSFLRSRS
VKRMREMQDCIEMDVFHDCTSDTDSNNTVENYFLENEQDLLPPRFENSPESVAGNDQK
AETVTAHNVVLTETEVDQIEVTAPPTRKWGSVVSSDVKDNHDVLVNRWFRVGTYAWTT
QQARDTTIVSLDLPKQAILVGSTCDQPNKIPFRIHRLWRGTMEIKIQINANKFQVGQL
QASWFYQPKADASFLTLRRDVYARSGGYHVIVNASPSNEVTMRVPFKAYKSMLQTKLR
NGYPDPLDEGTLFVTVLSPLVAVGNTSPKANFTVFVKFTDNEFTGMIAGDIDTPPSYE
MMEALPGIVKVAESLLTSSSNDKNRDNPPDNRAPIMFVPTASHSWSIGNDLTEPIHNL
RLSGKAQTKHPDVEGDEMTVDFIKRKFQLLDIFSWTTQDSTGSLLWSIPANPIPPRDR
MHVNIAADTSNNLLAGYQFTPVGFVSSMFQYWRGSLEYRFDFVATNFHEGRVMLAYIP
GIDELTTPTIEQARASPHVILSLQDTLSYTWKVPYISDTPWWPRRYAGNSALNNHNSP
SKIFMYVANELVLGETVPPSLEVLVYMRGGDDFEVAIPVQPATGLASDRRYLGTLTPF
TVYPSNAQYYSGSWHQIPNAQAFRRATTSEAYEVFTTALTDRLVYYELPNNHGLTAYN
QLTNSQYAIHFCIFLISPSHYGGFVGLPLIHTPGSSSSTNKLEQIVRAALAHNYNVGS
WISEFVARAPTDATDVTAPFGFFSNSWNTTSNPFGGSLTEPWDAREITEPVVNIEYPE
FEGNRDQSFTVVDNTQKLESMQDGMVLYGERFNDLKNYCRRYQFYGRYEVLGSTISTD
IGKCSLSIPVTPQGLRLDLGTTSGIHQIWNRARNGHIPMIASLYRFYRGSIRLRILIT
NSSGLQAWYQHRPDRRLTVNTVTPCETLRTAEAVLNHGYAYYIQNLDVNNIIEIEVPF
YQKANFGLLQDPNMTVEEFSNYFSLGEVALGFFGTVPATQNMEVTIFYSLADDCRFST
FQGVPPMVLLDDLPLNDSVARYEMFKWLLSPVKSTTDAVVEAVETKTAEAVQNLMTEV
QTKADEIQNKIGGKFDRHVVMNAVSHFIHCVINPTFKTITWALCCVLLSCGLIVMEAV
SGVTSAFVKIFDVLRSKYGISDEQRVEGEPPSRFEGPTGIDTTMTVERAAATGLITCL
LGCMCAVFGIQDVRGRMRTPKSWPTAIFEGIERGMKLSNVAFVFLRNIMSVLDSMRIW
ICSKFIKGYNAIQALDKTRDVISQWIERVTYITDPRVAIDIKYKQKLLIEFYDLYTLG
KRLISYIVECDAPNLRVSIHKAYDRLDKVAQKLADEGADPHVRKQPYTIYMFGGSNIG
KSEIQSQICQELLKSQNIVTPTVMNCVISTTSRYWDDCDRQPVLVVDDMFAVQTDELL
SLQLQTLFAVVSPVVLIPPKAHLEDKGKPYAPTIFWINSNYEYYKHPLVNEEAVWRRR
NILIKAERDDSFANPDCHHCKNKLKVHEIPAEYIKDIKDNHHLKFCYKLECDKPSVPY
SSWLTYSELMTVLKKEFAEDRAREEERFRMRLAANRAVTDKSDVAFDSDIVAEWTKAI
ELRRNAELASQQQYSAIMLRQMGAFGRKIKDMFNWFPSETKLAPIPGCYTCNALKTRC
GSCIYLTANPYQVKDTPTPRLDPTNEFDVVMLDVHKKIKEEETKREQERKKKEDDELE
DLDSISSSISIVTEAVVENTARFENDTDNVNVSHFIENFFSNNSFKTTPKVIEQFKRQ
LNTLPIAYVEACCALLRENLHLINVKLNEYPVYVQSYSMFKRILDEFCSTTRVMSGGC
VHNPKMCKIFHQDGRLVIMDSSGSVVNISEIFSNFVTWKIKCSTCLLFLPWVQLDLRS
ICLSSYPKVVETWMNDLIHTPIVTDKWYKEMWSDFNSYTYDFVTKKLPAAARKVWNFI
TSMKGMLCLLGGLFAGGMYMMMNTPTPEFFAYDTSYHASFVKRDRDDRGFDRYENKYD
NECVRVGKHRLRNSTAKPTIRFENSQPAEILPRLLDANFVQIYVEYEEDGKLTYNSST
CFMLYERRMIIERHYWEHWIRCPSSATFWLRCAKTVCNDYPLGLQLNLGNFKPIWFSD
VNKEGYATSNLGIVVLPPSVPCFKDLRKFIATTEDHPYINTRNCYLYDAREKNKVMLP
VNLRKNYAMGDETGNVKLDLVYAYPYSKYGLCGSVLVCGSLQRPIIGIHYAGTGMTGF
SEPLYFETFSEKLQKSKDNYDFDSYFYDMDDLEVSKFDFKTILYPHAVVPKELSHFQG
NKTQYRRSLLQDVFPVTAEPNPLSPGDRRLPKGSHPLRDGVAHMGKPPCDFNSKDLHL
AKEDLQNVLLGVVQPVRAVVGVVSLQDAIVGNSQIDGFEPLEWSTSPGFPLVSFRPPG
MKGKKWLFDLEESQDGYVLKGLHPQLKKTLNVEYNMRKRGVKVPTVFTDCLKDTVIPI
EKCKIPGKTRVFSISPVQFTIAFKMYFNDFLVSYRKSRFKAEHSIGIDVNSMEWTELA
HRLQSKGTKIVAGDYKNYGPGLMLLAVKHAFDIIIKWYEFFDKSSSKETNQLIRRVML
SEILYSYHLVANEIYSPSSGIPSGSPITTELNSLVNSLYLRCAWSELMRLPFSDMHLH
LAIVTYGDDVCVNVSDEIADKFNTSTLNVFFSKYNIVFTDVDKSDNIISCRTLDNVSF
LKRGFKRHPYFKNIYLAPIEEDSIFKCINWIREKGDPVEATLENCTQACELAFGRGPE
YYEQLRNQLIVECNQQLNELLIIDSWDAVSKRCYNI"
3'UTR 9791..9924
BASE COUNT 3017 a 1566 c 2078 g 3263 t
ORIGIN
1 cgggtattca cccgtacagc gagatattac taatcaatag agttttcaaa ttattcatac
61 acaacatccc atgcgtgagc ctatgtactc ttcagtatat agactttata ctattttgat
121 agtccatggt agtgttgtgt gttgataagt attttctcta tagatttgtt tgtatgctat
181 gtgtatgttt ggttatgata tattgcgaca cttataacaa aatggttatt ttaaattata
241 ttatatcgca tcttttatat tagactattg tacctagctt gcttgagtgc cccgatcatg
301 taatggcggg atcgggatca tcactccgca cttgtattat atgagcgatg atgaaaaagt
361 agatcattgt agtagcttga cgtggtaatc tagtaggatt tttccgagac agtcgcatat
421 gtagctagtt gttagtatgc gatgctggcg ttgtattacc aatacgttaa gagctattaa
481 tgctctatgg cttttattta gccttccaga cctgtataat acatttaaag aggcctccaa
541 ggttatagtc ttttgtaaat tgatattttc tggtttattt tgatcttttg ttatttttgt
601 tacaattgag agggttattt actttcaaca tacggcttaa tatctttccg tttttctttt
661 cttattttaa aaaatgaata agtctattaa gaataaaact accgccaacc cttcgacctc
721 ttccctttcc caacgaccca tgcttatccc tacgaatatt gaagatgctt tatgtgacat
781 tattgtcgga gattatatgc gcgatatggc taagatggaa gaaaaatatc gagcaaagta
841 tgatttacga catagatgtg gtttagattc tgctatagac gatttaagat taagtgaaga
901 gatggattta gcttataaga aaattattaa agatcgtaat tatttatggt atttagttaa
961 gtctgggcaa tatgaattgg ctgagaaaat tttagatact aatttcttag aagattattt
1021 acaaagtctg aaaatagaat atgttaagcg tcaagagcaa tctagagtag caaagattaa
1081 acgtagtaaa tcagatcctg tattatttag taaatgtacg tttctttatg ataatgatga
1141 ttacaattta acagcaacag aaaatgagga tgaattgatt aaagaagatg ttcgatcttt
1201 tatacgcgat acacgtcgat cgcgtaaaga acgttattca ttagcaacac taggagcagg
1261 taaagatgca atttatgtca tatatgacaa taataaaaaa gatcgtcaca catggtttga
1321 ttgtagtgat gtttctagtg tttctgaaag agtaattaaa gatgacgaga atagtagatc
1381 tttagctgat tggaataagt tagcatatgc cggtttgcgt ttacgtgcgt gtatagagaa
1441 atttgaggaa ctgcgtgaga agttgtatgt taaaatgttc agttttctac gtagtcgtag
1501 tgttaagagg atgcgtgaga tgcaggattg catagaaatg gacgtttttc atgactgtac
1561 ctcagataca gatagtaata atactgtaga gaattatttc ttagagaatg aacaagattt
1621 gttaccgcca cgttttgaaa attcacctga atcagtagca ggcaatgatc agaaagccga
1681 gacagtaacg gctcataatg ttgttcttac tgaaacggaa gtagatcaaa ttgaggttac
1741 ggcaccaccg acacggaaat ggggttcagt agtttcaagc gatgttaaag acaatcatga
1801 tgtattggtt aatagatggt ttagagttgg tacgtatgca tggactaccc agcaagctcg
1861 tgatactacc attgttagtc ttgatcttcc aaaacaagcg atacttgtag gttctacgtg
1921 tgatcaaccc aataagattc cgttcagaat tcatcgattg tggcgtggta caatggaaat
1981 taaaattcag ataaatgcaa ataaatttca agtaggacag cttcaagcat catggtttta
2041 tcaaccaaaa gctgatgcat catttttaac acttaggcgc gacgtttatg ctcggtcggg
2101 tggttatcat gttattgtta atgctagccc aagtaatgaa gtaacaatgc gcgttccgtt
2161 taaagcatat aaatcgatgc tacaaactaa attacgtaac ggttatcctg acccattgga
2221 tgaaggtact ttatttgtca ctgtactgag tccattagtt gcagtaggga atactagtcc
2281 taaagctaat tttactgttt ttgttaagtt tacagataat gaatttactg gtatgatagc
2341 tggtgatatc gatactcccc cttcatatga aatgatggaa gcgttaccgg gtatagttaa
2401 agtagctgag agtttattaa catcatcgtc taatgataaa aatcgagata atcctcctga
2461 taatcgtgca cctatcatgt tcgttccgac tgcttctcat tcatggagta tcgggaatga
2521 tttgactgag cctattcata atcttagatt atctggaaag gctcagacaa aacatcctga
2581 tgtagaagga gatgagatga ctgttgattt cattaaacgt aaatttcaat tattagatat
2641 cttttcatgg acaacgcaag attctactgg atctttattg tggtctatcc ctgccaatcc
2701 aattcctcct cgcgatagaa tgcatgttaa tatagctgca gatacgtcaa ataatttgtt
2761 ggccggctat cagtttacac ctgttgggtt tgttagtagt atgtttcaat attggcgtgg
2821 atcattagag tataggtttg atttcgttgc tactaacttt catgaagggc gagttatgtt
2881 agcttatatt cctggtattg atgagttaac tacccctact atagagcaag ctcgagcttc
2941 acctcacgta attctgtcat tgcaagatac attaagctac acttggaaag tgccgtatat
3001 aagtgatacg ccatggtggc cacgtagata tgcaggtaat tcagctttaa acaaccataa
3061 ttccccgtct aaaatattta tgtatgtagc taatgaactt gtgttgggag agacagtgcc
3121 tccgtcccta gaggtcttag tatatatgcg tggtggtgat gactttgaag ttgctatccc
3181 cgttcaacca gcaacaggtc ttgcatcgga tcggagatat ttagggacat taacaccttt
3241 tactgtatat ccttcgaatg cgcaatatta tagtggatct tggcaccaaa taccaaacgc
3301 gcaagctttc cgtagagcaa caacatctga ggcgtatgaa gttttcacca ctgctttgac
3361 cgaccgtcta gtttattatg agttacctaa taatcacggg ttgaccgctt ataaccagtt
3421 gacaaattca caatatgcca ttcatttttg tatatttttg attagtccca gtcattatgg
3481 aggttttgtt ggattgccac ttattcatac acctgggtcc tcaagttcca ctaataaatt
3541 agagcagata gtacgtgctg cacttgcgca taactataat gtcggatctt ggataagtga
3601 gtttgtggct cgagcaccta ctgatgccac agatgttacg gctccatttg gattcttttc
3661 taacagctgg aatacgacaa gtaatccttt tggcggaagt ttaactgagc cgtgggatgc
3721 acgtgagatc actgaaccag tcgttaatat tgagtatcca gagttcgagg gtaatcgtga
3781 tcaatccttt acagttgtcg ataatactca gaagttagag tcgatgcagg atggtatggt
3841 gttatatggt gagcgtttta atgatttaaa aaattattgt cgtcgttatc aattttatgg
3901 ccgatatgag gttttgggat ctacaataag tacggacata ggtaaatgct cgttgtcgat
3961 acccgttacc cctcaaggtc tccggttaga tttaggtact acatcaggta ttcatcaaat
4021 ttggaatcga gcccgtaatg gtcatattcc catgatagct tcattatata gattttatag
4081 aggttctata cgattacgta tattgattac aaatagttcg ggtttgcaag cgtggtatca
4141 gcatcgccct gatcggcgat taacagtaaa tacagtgact ccgtgtgaga cgttgagaac
4201 agctgaggca gttcttaacc atggttacgc atattatata caaaatcttg atgttaataa
4261 tatcatagag attgaggttc cattttatca aaaagctaat ttcgggttat tacaggatcc
4321 taacatgacg gttgaagagt tttcaaatta tttctcatta ggtgaagtgg cactcgggtt
4381 tttcggtact gtccctgcaa cacaaaatat ggaagttact attttttatt cattagctga
4441 tgattgccgt ttttccactt ttcaaggtgt tcctccaatg gtgttattag atgatttacc
4501 cttaaatgat tcagtcgctc gatatgagat gtttaagtgg ctattatcac ctgttaagag
4561 tactacggat gcagttgttg aagctgttga aacaaaaaca gctgaagccg tacaaaatct
4621 aatgactgaa gtgcaaacaa aagcagatga aattcaaaat aaaattggtg gaaaatttga
4681 tcgtcatgtc gttatgaatg ctgtgtctca ttttattcac tgtgttatta atccaacatt
4741 taagacaata acttgggcat tatgttgtgt tctattgagt tgtggtttga tagtgatgga
4801 agccgttagt ggagtaacta gcgcctttgt taaaatattc gacgtcttac gttccaaata
4861 tggtatctcg gatgaacagc gagtagaggg tgagcccccg tcgcggtttg agggtccaac
4921 aggtattgat acaacaatga ctgttgagcg cgcagctgct actgggctta tcacgtgttt
4981 attaggatgc atgtgtgctg tatttggaat acaggatgtt cgtgggcgta tgcgtactcc
5041 caaaagttgg cccacagcta tcttcgaagg aattgagcgt ggtatgaagt tgagtaacgt
5101 tgcatttgta tttttgcgta atataatgtc ggtattggat tcgatgcgta tatggatttg
5161 tagtaaattt attaaagggt ataatgcaat acaagcgttg gataagacgc gtgatgtcat
5221 ttcacagtgg atagagcgag ttacatatat tactgatcct cgagtcgcaa tagatattaa
5281 atataagcag aaattactta ttgaattcta tgacctctat acattaggta aaaggttgat
5341 ttcttacatt gtagaatgtg atgctcctaa tttaagagtt agtatacaca aagcttacga
5401 tcggttagat aaggtagcac agaagttggc tgatgagggt gctgacccac atgtaagaaa
5461 acaaccttat actatttata tgtttggagg tagtaatata ggtaaatctg aaatacaatc
5521 acaaatatgt caagaattgt taaaatcgca gaatatagtg actcccactg ttatgaattg
5581 tgtaatctcc accacttcaa gatattggga tgattgtgat aggcaacccg tattagttgt
5641 tgatgatatg tttgctgttc agactgacga actactgtct ttgcaattgc agactttgtt
5701 tgctgtcgtg tctcctgttg tgttaattcc tccaaaagct catttagaag acaaaggaaa
5761 accgtatgct ccgactatat tttggattaa ttcaaattat gagtactata aacatccgtt
5821 agttaatgaa gaggctgtat ggcgtcgtcg taatatttta ataaaagctg agcgtgatga
5881 ttcttttgcg aatcccgatt gtcatcattg taaaaacaaa ttaaaagtac atgaaatccc
5941 tgctgaatac ataaaagata ttaaagataa tcatcatttg aaattttgct acaaattgga
6001 atgtgataaa cccagtgttc catatagtag ttggttgaca tacagtgaat taatgacagt
6061 attaaagaaa gaatttgctg aggaccgtgc gcgcgaagaa gaacgttttc gtatgcgttt
6121 agctgccaac agagctgtaa ctgataaatc ggatgttgcg tttgatagcg atattgttgc
6181 tgagtggact aaagcaatag aattacgtcg taatgcagaa ttggcttctc agcaacagta
6241 tagcgctatc atgcttcgac aaatgggagc gtttggaaga aaaatcaaag atatgtttaa
6301 ttggtttccc tctgaaacca agttagctcc tattcctggc tgttacacgt gtaatgccct
6361 taaaacacga tgtggctcgt gtatttatct cacagcaaat ccatatcaag taaaagatac
6421 acctacacct agattagatc ctactaatga gtttgacgtt gtcatgttag atgttcacaa
6481 gaagattaaa gaagaagaaa caaaacgcga acaagaacgt aaaaagaaag aagatgatga
6541 attggaagat ttagattcta tatcttcatc gattagtatt gtaacagaag ctgtggtgga
6601 aaacacagcg cgctttgaaa acgatactga taatgttaat gtttcgcatt ttatagaaaa
6661 ctttttctcc aataattcat ttaagactac accgaaagtt atagagcaat ttaaacggca
6721 attaaatacg cttcccatcg cgtacgttga agcttgttgt gcactattgc gcgagaattt
6781 gcatcttatt aatgttaaat tgaatgaata tcctgtgtat gtgcagtcat atagcatgtt
6841 taagagaatt ttagatgagt tctgtagtac tacacgagtc atgtcgggag ggtgtgttca
6901 taatcctaaa atgtgtaaaa ttttccatca ggatggtcga ttagttataa tggactcttc
6961 tggttctgta gttaatattt cagaaatctt ttcaaatttt gtaacgtgga agataaaatg
7021 tagtacatgt ttgctgttcc taccatgggt gcagttagat ttgcgtagca tatgtctgtc
7081 gagttaccct aaagttgtag agacgtggat gaatgatcta atccacacgc ctattgtcac
7141 agataaatgg tataaagaaa tgtggtctga cttcaatagt tatacgtacg acttcgtgac
7201 taagaaatta ccagctgcgg ctagaaaagt gtggaatttt ataacatcta tgaagggaat
7261 gctgtgttta ttgggaggtt tgtttgcagg tggtatgtat atgatgatga atacaccgac
7321 tccggagttc tttgcttatg atacttctta tcatgctagt tttgtaaagc gcgatcgtga
7381 tgatcgtggt tttgatcggt atgagaataa gtatgataat gaatgtgtgc gtgtgggtaa
7441 acatcgtctg cgcaatagta cagctaagcc tactatccgt tttgaaaata gccagcccgc
7501 cgaaattctt ccgcgattac tagacgcaaa ttttgttcag atttatgttg agtatgaaga
7561 agacggtaag ttaacataca atagtagtac ttgttttatg ctttatgaac gtaggatgat
7621 aatagagcgt cattattggg aacattggat ccgttgtcct tcttctgcaa ctttctggtt
7681 aaggtgcgct aaaacagttt gcaatgatta ccctctaggt ttacaattaa atttaggaaa
7741 cttcaaaccc atatggttta gtgatgttaa taaagaaggt tatgctacga gtaatttagg
7801 aattgttgtt ttaccaccgt cggtcccgtg ctttaaagat ttacgtaagt ttatagctac
7861 aactgaagat catccatata ttaatactag aaattgttat ttatatgatg ctagagagaa
7921 aaacaaagta atgttgcctg ttaaccttag aaagaactat gctatgggtg atgaaactgg
7981 taatgtaaaa ttggatttag tgtatgctta cccctatagt aagtatgggt tatgtgggtc
8041 cgtgttagta tgtggttctc tccagcgtcc gataataggt attcactatg ctggaacggg
8101 catgacagga tttagtgaac ctctatattt cgaaactttt tcagagaaat tgcagaaaag
8161 taaagacaac tatgactttg atagttattt ttatgatatg gatgatttag aagtatcaaa
8221 atttgatttt aaaactatat tgtatcctca tgccgtagta ccaaaagaac tgtctcactt
8281 tcaaggtaat aaaacacaat accgtcgtag tttattgcag gacgtgtttc ccgtaacagc
8341 agagcccaat cctctctctc ctggtgatcg tagattgcct aaaggatcgc accctcttcg
8401 tgatggtgtg gctcatatgg gtaaacctcc atgtgatttt aatagtaaag atttacattt
8461 agctaaagaa gatttacaga atgtgttact aggtgtagtg caacctgtta gggcagttgt
8521 cggcgtagtc tctcttcaag atgctattgt tggcaatagt caaattgatg gttttgagcc
8581 tttagaatgg tccaccagtc ctggttttcc tcttgtatct ttcagaccgc cgggtatgaa
8641 agggaaaaaa tggttgtttg atctggagga aagtcaggat ggatatgttc tgaagggact
8701 ccatcctcaa ctaaaaaaga cattaaatgt agaatataat atgagaaagc ggggtgtgaa
8761 agtgcctaca gttttcacag actgtttgaa agatacagtt attccaatag aaaaatgtaa
8821 aattcctggt aaaactcgtg ttttctctat aagtccagtt caatttacta tagcctttaa
8881 gatgtatttt aatgattttc tggtgtcata tagaaaaagt agatttaaag ctgaacatag
8941 tataggaata gatgtaaata gtatggagtg gacggagctt gcgcatagac tacaatcaaa
9001 aggtacaaag atagttgctg gtgattataa aaattatggt ccaggattaa tgttgcttgc
9061 tgttaaacat gcttttgaca taattataaa atggtatgaa ttcttcgaca aatcaagttc
9121 aaaagaaact aaccagctta tacgtcgtgt tatgttaagt gagattcttt atagttatca
9181 tttagtagcc aacgaaattt attcaccatc tagtggtatc ccttctggat cgcctattac
9241 aacagaatta aatagtttag tgaattcttt gtacttgcgt tgtgcatggt ctgagctcat
9301 gcgtttgcct tttagcgata tgcatcttca tttagctata gtcacctatg gtgatgacgt
9361 gtgcgtaaat gtatcagatg aaattgctga taagtttaat acaagtactt taaatgtatt
9421 ttttagtaaa tataacatag tttttactga tgtcgacaag agtgataata ttatttcgtg
9481 tcgtacatta gataacgttt catttttaaa aagaggtttt aagcgtcacc cttattttaa
9541 gaatatatat ctagccccga ttgaagagga tagcatcttt aaatgtatca actggatacg
9601 tgagaaaggt gatcctgtag aagcaacgtt agaaaattgt acgcaagctt gtgagttagc
9661 gtttgggcgc ggtcccgagt attacgaaca attgcgaaat caacttatag ttgaatgtaa
9721 tcaacagttg aatgagctat tgatcattga ttcttgggac gctgtttcca agcgttgtta
9781 taatatttaa atatacatat ttatcgcgta tatgtttgta tgtatagcta ttttagtata
9841 agattatata cgggaatgcg ctttttgcgc cgaaagagat tttaataaaa tctacgatgt
9901 accgtataat aactatagga atgc
//
LOCUS BF2-astro-YN-CHN-2020 5659 bp RNA linear VRL 07-JAN-2021
DEFINITION Mamastrovirus 18 isolate BF2-astro-YN-CHN-2020.
ACCESSION BF2-astro-YN-CHN-2020
VERSION
KEYWORDS .
SOURCE Mamastrovirus 18
ORGANISM Mamastrovirus 18
Viruses; Riboviria; Orthornavirae; Pisuviricota; Stelpaviricetes;
Stellavirales; Astroviridae; Mamastrovirus.
REFERENCE 1 (bases 1 to 5659)
AUTHORS Han,Z., Xiao,J., Song,Y., Lu,H., Zhang,K., Li,J., Si,F., Sun,Q.,
Wang,D., Zhu,S., Yan,D., Xu,W. and Zhang,Y.
TITLE Large-scale screening for SARS-CoV-2 from specimens of several host
species and highly diverse RNA viruses
JOURNAL unpublished
REFERENCE 2 (bases 1 to 5659)
AUTHORS Han,Z., Xiao,J., Song,Y., Lu,H., Zhang,K., Li,J., Si,F., Sun,Q.,
Wang,D., Zhu,S., Yan,D., Xu,W. and Zhang,Y.
TITLE Direct Submission
JOURNAL Submitted (07-JAN-2021) National Institute for Viral Disease
Control and Prevention, Chinese Center for Disease Control and
Prevention, No. 155, Changbai Road, Changping District, Beijing,
Beijing 102206, China
COMMENT Bankit Comment: ALT EMAIL:hansir8@qq.com
Bankit Comment: TOTAL # OF SEQS:20
##Assembly-Data-START##
Assembly Method :: Trinity v. 2.8.4; Sequencher v. 5.0
Assembly Name :: metagenomic assembly
Coverage :: 90
Sequencing Technology :: Illumina
##Assembly-Data-END##
FEATURES Location/Qualifiers
source 1..5659
/organism="Mamastrovirus 18"
/mol_type="genomic RNA"
/isolate="BF2-astro-YN-CHN-2020"
/isolation_source="anal and throat swabs"
/host="Miniopterus schreibersii"
/db_xref="taxon:1239582"
/country="China"
/collection_date="20-Feb-2020"
5'UTR 1..61
CDS 62..1777
/codon_start=1
/product="ORF1a"
/translation="MKLVKGHFAVVGATILSFFTKFFEVPDMVVVAVMVVWRLFIIMQ
LNGDRVEVKDANGKTINVVPSKPAWLARAAGIKDFVQSARHKIVESFTQKVRKKTVVP
VRVLTNSILGIESSAGIGTGFRVANNIITASHVVGSDDVVRVSWGASNFSAKVLKHLG
NDVAILGLPAEAHPVQPFRFAKECKDGTVVITGMNKNGDYIVAAAEGVIIGDQWTYAV
QTLDGMSGAPITNENGRIVGVHLSNTGFTGGGAVLRSSDVHEESEIEKLRRELALLKS
QAVPESTPSQDKTPPMHLSSGPLDQSKEVHPLPESFVFDCTDIVGLIREAVRREIEVL
RHELDPMSQAKGKTKMKARLGKHKSKRIRAFTEEEYKALQEKGYTRDQLRDMAAVIIE
RMNEDSYDYDDGGYPEFAEISEEERREIERDWLGTSAEHEDYVRDSYRQSYVVEAVPV
ESDYNPKTHPWDVYDKYSLCMYHVTEADVKIVGQALLDYDRFLTKWMARNLRGNEWQS
GIDIAKELKELADAKLRLEILMTQNGLTPFCQRKKKERKPRTIKKTQKNVKTPPQEGG
ESPTP"
CDS 1774..3306
/codon_start=1
/product="ORF1b"
/translation="MMKLDSWRLYLEDPKRVVVPENFPVIGSIQIDRPISDWTIPNDP
LIGLLPKPPEFEYKYGPSVWGYDAYAKSFEKFFYAEPVEGIKNAYPKYWDFANKCLIR
EYDYLKNTHLIDITSTVKNVDSTPAFPKFLFWRTEEEYLDERGYADYIQQYNDIAGGD
RPNVLWYLFLKKEMLKIDKIKESDIRQIVCPDPIFSRIGAMFEQDQNNRMKDMTRWRQ
SQCGWSPFEGGFHEVISRLDRPGHSYIEFDWTRYDGTIPVEVFRHIKRFRFSMLDPVY
KTDINSQVYDWYVSQLMYRYVLLPSGEITIQDRGNPSGQISTTTDNNMVNTFLQAFEF
AYMNPELSSDELDVLYSQCDSLIYGDDRLTSWPIVPENYARDVSAMYEHIFGMWVKPD
KIKVSNTLEGLTFCGFTVIREGGYYLPVPSDAWKFITSTINPTKQLPDFDALVGKILS
YQILTHNLPDDDPVKNWFEEAHSALVLHNRVSGGDPLPTITRDMRDFLWRGGPKKNGG
GS"
CDS 3290..5657
/codon_start=1
/product="partial ORF2"
/translation="MAEAPKPQRPRRRVRSRNAGTSSAAPTADVTPSGASAAGPRSRR
RGRRNRRPRQIVNSEVVIARPWPRRRRLTRAIKAELEREGLKGPKVSVQQKITATFGL
IRPNTTGNVELELSTFLHPSLAKEANDGTAFGPLQALAAQYSLWKLKHLNVRFTPMVG
ASAVSGTVVRTSLNLSQSPGVSNWSGLGARLHVDMHPGQTSVFTLRGDQLAGPRDGGW
WFTDTNEEGSQSAGPIIEVHTMGETKSTFQTDHPWTGPLFLVEGIGTWQFANYNVKPA
LGSLERREGTSTVEIKANASQPITMVMDKANEVTQFMDAAEPETLAVPTGQSVGETIF
QVVDVGAVLAQNIAPPPFGWLIKGGWWFVKKLLGRTRDGTSEFVVYASLQDAQNNKPA
VASASLTSGNRKTTDLMVTQINAPNVGPNPYATGVPRAGPQILKPGSTFRVSAQMITE
LFVRVPKKGTDPQHAVAVPVSAIPGVTRQVGTGTLVEAPTTSTAVFIQTPWWVGRPDK
FPGALLPSDINDTEYLPADQKGGYVQSLYRLINPRFTDQSGEFEYLEPVISDDGAEFF
VLENFGGGTYNDGNWQPGNGQGTISQLHYYRPFGKVVATSKIHSGTDPVLDMVINLIR
VTKPLTLSQDNVKEMYLAFGDNANQIQFTKAPKADSVQSSTWNILERDIPPDTYLLAV
SYTNTPGTVNGIDIPTFLYFKTYSRVESTQSPIFPYNLCGQMLPATSVDIQLQYVQYH
PPSQDLVEQLRNLGISVPSEPFSSKESGKPGPLVGGQGSGDSFIPCILP"
gene 5657..5659
/gene="partial genome"
BASE COUNT 1393 a 1176 c 1386 g 1704 t
ORIGIN
1 tgctgcctta caattcatag ttgccttagt cttggggttg gtcctagacg atgttggcta
61 catgaaactt gtgaagggcc actttgccgt tgttggagct acaatccttt cgttttttac
121 gaagtttttt gaagttcctg acatggttgt agtggctgtg atggtagtgt ggcggctttt
181 cattatcatg cagttgaatg gtgatagggt tgaggttaag gatgcaaatg gaaaaaccat
241 aaatgttgtt ccatcaaaac ctgcttggtt ggctagagct gctggcatca aggattttgt
301 tcaatctgca cgtcataaga tagttgagag ttttacccag aaggttcgga aaaagaccgt
361 tgttcctgtg cgggtgctta ccaattccat cttggggatt gagtctagcg ctggcatagg
421 aactggattc cgagttgcca acaatatcat cactgccagc catgttgttg gttctgatga
481 tgttgttagg gtttcctggg gtgcttctaa tttttcagct aaagtgttga agcatctcgg
541 taatgacgtt gctatccttg gtttgccagc tgaggcccat ccagttcagc cattccgctt
601 tgccaaggag tgcaaagatg ggactgttgt tataacaggg atgaataaga atggtgatta
661 tatcgttgct gctgctgagg gggttattat tggtgaccaa tggacttatg ctgtccaaac
721 tttggatggt atgagtggag cccctattac aaatgagaac ggtaggatag ttggtgtcca
781 tctgtccaac actgggttta ccggtggtgg tgccgttctt cgcagtagcg atgttcatga
841 ggagtccgag atcgaaaaac tccgtcgtga attggccctg ttgaaatcac aggctgtccc
901 agaaagcact cctagtcagg ataagacacc tcctatgcat cttagttctg gtccacttga
961 ccagtccaag gaagttcatc ccttgcctga atcttttgtt tttgattgta ctgacatagt
1021 tggccttatt cgtgaggcag ttaggcgtga gattgaggtc ttacgccacg aacttgatcc
1081 tatgtctcag gctaagggta aaactaagat gaaggctaga cttggcaagc ataagagcaa
1141 gaggattagg gcttttactg aggaagagta taaggctctc caggaaaagg gttatactcg
1201 tgatcaactt agggatatgg cagctgttat catagagcgt atgaatgaag attcttacga
1261 ttatgatgat ggtggttacc ctgagtttgc tgaaatatca gaagaggaac gccgtgagat
1321 cgagcgtgat tggcttggta ctagcgcgga acatgaggat tatgtccgcg acagttatcg
1381 ccaatcatat gttgttgagg ctgttcctgt tgagagcgac tacaatccca aaactcatcc
1441 ttgggatgtt tatgataagt actcactctg tatgtatcat gttactgaag ccgatgttaa
1501 gatcgttggt caagctttgc ttgactatga tcggtttcta acaaaatgga tggcacgaaa
1561 cctacgtgga aatgaatggc agtctggcat tgacatcgct aaggagctga aggagctggc
1621 ggacgctaag cttcgtctag aaatcttaat gactcagaat ggcttaacac ctttttgtca
1681 gcggaagaaa aaggagagga aacctaggac aataaagaaa acacaaaaaa acgtgaagac
1741 cccccctcag gagggggggg aatcacctac tccatgatga aattggattc gtggaggttg
1801 tatttagaag atcctaaacg tgttgttgtc cctgaaaatt tccctgttat tggcagtatc
1861 caaatagata gacccattag tgattggact attcctaatg accctctgat tggacttttg
1921 cctaaacctc ctgaatttga gtataaatat ggtccatctg tatggggata tgatgcatat
1981 gctaaaagtt ttgaaaaatt cttttatgct gagcctgttg aaggaatcaa gaatgcatac
2041 cctaaatatt gggactttgc caacaagtgt cttatacgtg agtatgatta tcttaaaaac
2101 actcacctta ttgacataac atctactgta aaaaatgttg attctactcc cgcttttcct
2161 aaatttcttt tctggcgtac tgaagaggag tatttggatg agcgggggta tgctgattat
2221 attcagcaat ataatgacat tgctggtggt gaccgtccca atgttttgtg gtatcttttc
2281 ttaaagaaag aaatgctcaa aattgataag atcaaggaat ccgatatccg tcaaattgtg
2341 tgtccagatc ccatattttc taggattggt gccatgtttg aacaagatca aaataatagg
2401 atgaaagata tgacccggtg gagacaatca caatgtggat ggtccccttt tgaagggggt
2461 ttccacgaag ttatttctcg tctagatcgg ccgggccatt cttatatcga gtttgattgg
2521 actcggtatg atggtaccat tcctgttgag gtttttcggc acattaagcg gtttcggttt
2581 tccatgttgg atccagtgta taaaaccgac ataaattcac aagtctatga ttggtacgtt
2641 agtcagctta tgtaccgata tgttttgtta ccctctggtg agattaccat acaagatcgt
2701 ggtaatcctt ctggtcagat atcaaccact accgataata acatggttaa tactttcttg
2761 caagcttttg aatttgcgta tatgaatcct gagctatcca gtgatgaact ggatgtttta
2821 tattcgcagt gtgattcatt gatatatggg gatgataggt taacatcttg gcctatcgtt
2881 ccagaaaatt atgcgagaga tgtgtctgcc atgtatgaac atatttttgg tatgtgggtt
2941 aaaccagaca agataaaagt ttccaatact ttggagggtt tgactttttg tggatttact
3001 gtcatacgtg aaggcggtta ctatttgcct gttccatctg atgcctggaa atttattaca
3061 tctaccatta atcctactaa gcagttgcca gattttgatg cgctcgtggg aaagatcctc
3121 agttaccaaa ttttaacaca taatttgccg gatgacgatc cggttaagaa ttggtttgag
3181 gaagcgcatt ccgccctagt ccttcacaat cgcgttagtg gtggggatcc actccctacc
3241 attactcgcg atatgaggga ttttctttgg aggggtggac caaagaaaaa tggcggaggc
3301 tcctaagcca cagcgccctc ggcgcagagt tcgatctagg aatgccggga cttccagtgc
3361 tgcccccaca gcggatgtta ccccatctgg tgcttctgct gcgggtcctc gttctcgccg
3421 tcgaggccga cgaaatcgtc gacctcggca gatcgtcaac agtgaggtgg ttattgcgag
3481 gccttggcct cgccggcgtc gtctcactcg cgcgatcaag gctgagttag agagggaagg
3541 ccttaagggt ccgaaggttt cagttcaaca aaagataacg gccacttttg gtcttatccg
3601 tcccaataca actgggaatg ttgagcttga gttgagtacc tttttacatc cctccttagc
3661 caaggaggct aatgatggta ctgcctttgg ccctctgcag gccttagctg cacaatattc
3721 actgtggaag ttgaaacatc tgaatgtccg gtttactcct atggttggtg cttctgcggt
3781 ttctggcaca gtagttagaa catctttgaa tctatcccaa tcccctgggg tttctaattg
3841 gtctggtttg ggtgcacgct tgcatgttga catgcaccca gggcaaacat ctgttttcac
3901 ccttcgtggt gatcagcttg ctggccctcg cgatggtggt tggtggttta ccgataccaa
3961 cgaggagggc tctcagtctg ctggtcccat aattgaagtt cacacaatgg gtgaaacaaa
4021 atctaccttc cagactgatc atccttggac tgggcctctt ttccttgtgg agggcattgg
4081 gacttggcag tttgctaact acaatgttaa accagccctg ggttctcttg aacgcaggga
4141 gggtacctcc actgttgaaa tcaaggctaa tgctagtcaa cccataacta tggttatgga
4201 taaggctaat gaggttaccc agttcatgga tgctgctgaa cccgaaacac ttgctgttcc
4261 aactggtcag tctgttgggg agaccatctt tcaggtggtt gacgtcggag ctgttttggc
4321 ccaaaatata gcccctcctc cctttggttg gttaattaag gggggctggt ggtttgttaa
4381 gaaattgctt ggccgtactc gtgatggcac ttctgagttt gttgtttatg catctttaca
4441 ggatgcgcaa aacaataagc cagctgttgc ttccgcttct ctcacgagtg gtaatcgtaa
4501 gaccacagat cttatggtta ctcagataaa tgctcctaac gttggcccta acccttatgc
4561 gactggcgtt ccccgtgctg gtcctcagat cctaaagccc ggctcgactt tccgggtatc
4621 tgctcaaatg attactgagc tttttgttag ggtcccaaag aagggtacag atccccagca
4681 tgctgttgct gtcccggtgt cagctattcc tggtgttact cgccaggttg gtactggcac
4741 tttggttgag gctccaacta caagtacagc agtattcatt cagaccccat ggtgggttgg
4801 gcgccccgat aagtttccgg gtgcattgct tccatctgac atcaacgaca ctgaatacct
4861 tcctgccgat cagaagggtg gttatgttca gtctctttac cggctaatca accctaggtt
4921 caccgaccaa tcaggtgaat ttgaatatct tgagccggta atttctgatg atggtgctga
4981 gttttttgtt ttagagaatt ttggtggtgg tacttataat gatggaaact ggcaacctgg
5041 caatggccag ggtaccatca gccaactcca ctattatagg ccttttggta aagtggttgc
5101 aacttccaaa atacattctg gaactgatcc agtgcttgat atggtcatta atttgattcg
5161 tgtcactaaa cccttgacct tgtctcaaga caatgttaag gaaatgtatc tggcttttgg
5221 tgataatgcc aaccagattc agttcactaa ggctccaaaa gctgactctg tacagagtag
5281 cacatggaat atcttggagc gtgacattcc accagacacg taccttttgg ctgtatctta
5341 tacaaatact cctggcactg tgaatgggat tgatatcccc acattccttt acttcaagac
5401 ctattcacgg gtggagagta ctcagtctcc catctttccg tacaatttgt gcgggcagat
5461 gcttccagcg acatctgttg atatccagct tcaatatgtc cagtatcatc ctccaagtca
5521 ggatttggtt gagcaattgc gtaatcttgg gatttcggtc ccctctgagc ccttctcatc
5581 taaagagtct ggtaagcctg ggcctttggt gggaggacaa ggttctgggg attcgtttat
5641 cccttgcatt ttgcccccg
//
LOCUS BF2-picornavirus-YN-CHN-2020 8173 bp RNA linear VRL
07-JAN-2021
DEFINITION Picornaviridae isolate BF2-picornavirus-YN-CHN-2020.
ACCESSION BF2-picornavirus-YN-CHN-2020
VERSION
KEYWORDS .
SOURCE Picornaviridae
ORGANISM Picornaviridae
Viruses; Riboviria; Orthornavirae; Pisuviricota; Pisoniviricetes;
Picornavirales.
REFERENCE 1 (bases 1 to 8173)
AUTHORS Han,Z., Xiao,J., Song,Y., Lu,H., Zhang,K., Li,J., Si,F., Sun,Q.,
Wang,D., Zhu,S., Yan,D., Xu,W. and Zhang,Y.
TITLE Large-scale screening for SARS-CoV-2 from specimens of several host
species and highly diverse RNA viruses
JOURNAL unpublished
REFERENCE 2 (bases 1 to 8173)
AUTHORS Han,Z., Xiao,J., Song,Y., Lu,H., Zhang,K., Li,J., Si,F., Sun,Q.,
Wang,D., Zhu,S., Yan,D., Xu,W. and Zhang,Y.
TITLE Direct Submission
JOURNAL Submitted (07-JAN-2021) National Institute for Viral Disease
Control and Prevention, Chinese Center for Disease Control and
Prevention, No. 155, Changbai Road, Changping District, Beijing,
Beijing 102206, China
COMMENT Bankit Comment: ALT EMAIL:hansir8@qq.com
Bankit Comment: TOTAL # OF SEQS:20
##Assembly-Data-START##
Assembly Method :: Trinity v. 2.8.4; Sequencher v. 5.0
Assembly Name :: metagenomic assembly
Coverage :: 90
Sequencing Technology :: Illumina
##Assembly-Data-END##
FEATURES Location/Qualifiers
source 1..8173
/organism="Picornaviridae"
/mol_type="genomic RNA"
/isolate="BF2-picornavirus-YN-CHN-2020"
/isolation_source="anal and throat swabs"
/host="Miniopterus schreibersii"
/db_xref="taxon:12058"
/country="China"
/collection_date="20-Feb-2020"
5'UTR 1..534
CDS 535..7923
/codon_start=1
/product="polyprotein"
/translation="MLFSYLSSFKSSSHTFPQAFSKAPSHRVLSWILSQGAPHHRGSY
LHATLPYNIYEQDMFDKLCLAVLPGKYRMKPIRQGLTLSRPRGPKFMIVYTNQNPVDG
FDVRRVNEGEVLQIGWREDPDGMYRICAVPQIGMEIAETTSQTWWDAVDQLNYRTPFK
FSLLNLPPDVRINRHLIQRQGNSTTNIYGNGNSVTTDVGANGWTPTVNTSVGDNPMSS
SNQTGGGSGPGIKGGSSTSSKDKVASGNHVGSRYSKWWEPAAARGLERGIEHAINLGD
KVIEGAASAVGAGVDALKHKLHKHSPPPAANLLVSLPTSNQAGTTEIQSQAPSAHVIA
YPPTEAVVLPSPDAPSVPGPSGDRAWLVDTFQWGTDVPPSQWLAGPNSYDPQPAAYPP
KPTGHANGGCYPLPWALVTAQPQCVWSAMYSNHSYWNAGFRVQLTVNGSQFHSGCLVL
CAAPEGVGRSYGAEGDLFTAPYALLNLCTGNSCTLEVPYISPTPNASTDFLHAPWVFF
VSVLTPLMAPTGSPQTLQVNLYVTPLNSSFHGLRYPVRQHIKVRNVPGHGAFGTAVAG
QEMPLVGVDAARPDSGYLPARPTNWLEFAGRPGLLASLTWTMADEPATRLQSLPISPD
ALASTTTGIGFVLTLFSQWQGEVKAQLLFTGSAQHYGRLVVAYTPPASRPPANLDEAM
HGTYEVWDVNGSSTLDFTIPFMSQSYWKTVDIGTPDGLLSNNGYLSVFVMNPLTGPSS
SPPSATIQAFVMAGDTFNVRFQQSPALGWQAADEGETEAAVSSMEQSQPTGDLGEQTT
MTYHQTDLHPDTILKNYFSFFRTLALKEGGGPLLMQAGSVQLFPLDPMTMFKSDVTVL
LSSFTYFVADLRINLRVVTNISASTTLSVGLIPAGATIPPGIENTTVATATMSNFTLI
EQPLPATGSIELSLSLPYTSPQSALCTVYNGWESYDGKNYGHLHSNTFGTLVFYTVAP
QLPGPPLPGTETISISAWYGFGDFQGFVPRPPPALGPLPSQSIANLNGAATFVRRAKD
RTYARRQAAVHLDFGIEPEDRAFVVRVQRSTYVHWAIRHCRWDGKVSQISLQNVACQA
VIGFETPEGDEVVECELDHWERACALVGSTYPYNAHHNCSTFIEDLTGYPCSNSGLSI
GAGAALLGVAALAASAGVQTLKASRQGLGDLSSAAKVMTQTNVDAAFTVARDGIRVAN
VGSERLATAADRLYRASENVDFRRLENAANTLSDAARRVADSIDGARDTVENLSSVLQ
TPATSPFNSFFRWIAKFFGYLLIIFGSPTPMSIGGLLLVILADALPSVTEFFKKSGTV
IGAAFYWVASKLGYNVDPAEAEQAAAEEPVAERQGVKDFNDTMTAMRHADWLLDKVLA
TMERLLRWLDKRAGDDPGKLVADNHDKILELYTDSITAVSSPPTTLDVQAVKHNKDVA
TKLLTASQKAHDQHHSVLLSQALRNYATVLGKNPGLNPGSRPEPLVVYIYGPPGCGKS
LLASLIASTCAARLGSGPDDFYSPTSPDCEFFDGYSGQPVHFIDDIGQDPEGRDWAHF
PNLVSTAPFIVPMASLEAKGTFYTSSLIVATSNFQGPNDRSARSLAALERRLHIRLKV
TPEGVFDVDSALAACGPATRHFNHECPLTRLEACSVRQDPRSITPVTFTDLDDLVDAI
LDQVQVRRSHCTNFKGLIRQAGDPLPEPSPDEQIPSSQPPSGESFRVFRSTEDDFTRA
AHRNAPVPVLESLWKYRVPIYYTAAFFTIVSSIIAIIYFARQVRSQSQGAYSALPVPK
PRKPQPKPRSIPKSAAQRQGTLPPAIPKLAENLVPVTAYADDKALRSMSLFFLQGRWA
VTASHLIHDATHIKVGDTMLSLSDLLYAVDGELMAINIPGREHRNVVRFLNPNSTFSS
GFLISAVFNGTSYVRFSGVKQTPLDIEDVIVESRALVYSCSSFPGLCGAPVITADPSG
CSIRGIHVAGVPGSSGMACELSPERWAAMLAATASRQSILEPIEPVGPPTHIQRSTAL
KPSPAYGAYPLSKEPAVLSRKDPRLYPTVDFDVQVYAKHNQGDITEPWPGLVEAFDLY
FSPFPRKIRTLTMDEAINGTPNLDGIDMNQSPGYPWVSKGRSRRSLFTWEGDRWCPIP
ELVKEVEAVLSDPVYVYTTSLKDELRPLDKVRCGGTRLIEAAPIQAIIAGRMLLGGLF
EYMQADPGSHGSAVGCNPDYHWTKFFWDFSSYDQVFDLDYKGFDATLPSICFKLLSQH
LHRIIGDDRIPAYIDSISTSTHVFGSYFYRMVGGNPSGCVGTSIFNTIINNCCLISAL
MSHPDFSPTGYQILAYGDDVIYATEPSIHPRFVKEFYDEHTTLVVTPASKTGVFPEYS
DIFDVTFLKRWFVPDDIRPMYVHPVIQPEVYQQSVMWLRGGEFQDVVTSLCYLAFHAG
PINYGYWCSKVQEAAARVGVEPVFLPYSYLQLSWLKLVSA"
3'UTR 7924..8173
BASE COUNT 1605 a 2342 c 1883 g 2343 t
ORIGIN
1 tggcccttcc cttccccctt tcatgattcc cttggatttg actcggattg tttgactacc
61 cttcttctta ccacattggc cttagcggcc accggactga cttaccccca tggcaagctg
121 aacgccttcg cagcggaggt cccttcttcg gatacggttg accactgcgt aagtcgcggg
181 cccaagtgag cttttggact gacccatttt gttttctgga ctgccaccgc caagaattgc
241 ggagcagctc tgtgtagaga gatccttcct ttaggccgac cccgtgtccc agcacggtag
301 taggactatt ggagtgcttt gcacatctgc gcctagtgtc agatgagcca gtggtgtcac
361 aggaaaacgg gacgcgattc gctatcccta agcatccctc ttcggaggta aagcgcctgt
421 ggcatacggt gggatcgtgc cttcactcga gggccgggaa acccaccctg gactggtgca
[truncated: 3,027 more rows]
